# Supplementary material for: Sialidases and fucosidases of Akkermansia muciniphila are crucial for growth on mucin and nutrient sharing with mucus-associated gut bacteria
Source: PubMed Central journal article supplement (PMC10067855; doi:10.1038/s41467-023-37533-6), 2023-04-01
Supplement: 41467_2023_37533_MOESM3_ESM.pdf [file 41467_2023_37533_MOESM3_ESM.pdf]

## **Description of Additional Supplementary Files**

File Name: Supplementary Data 1

Description: LC-ESI/MS data.

File Name: Supplementary Data 2

Description: LC-ESI/MS data without glycans with relative abundance <0.5%. The latter file is cited only in the SI data per relevance and clarity.
