# Supplementary material for: Sialidases and fucosidases of Akkermansia muciniphila are crucial for growth on mucin and nutrient sharing with mucus-associated gut bacteria
Source: PubMed Central journal article supplement (PMC10067855; doi:10.1038/s41467-023-37533-6), 2023-04-01
Supplement: 41467_2023_37533_MOESM6_ESM.pdf [file 41467_2023_37533_MOESM6_ESM.pdf]

## Reporting Summary

Nature Portfolio wishes to improve the reproducibility of the work that we publish. This form provides structure for consistency and transparency in reporting. For further information on Nature Portfolio policies, see our [Editorial Policies](#) and the [Editorial Policy Checklist](#).

### Statistics

For all statistical analyses, confirm that the following items are present in the figure legend, table legend, main text, or Methods section.

- | n/a                                 | Confirmed                                                                                                                                                                                                                                                                                      |
|-------------------------------------|------------------------------------------------------------------------------------------------------------------------------------------------------------------------------------------------------------------------------------------------------------------------------------------------|
| <input type="checkbox"/>            | <input checked="" type="checkbox"/> The exact sample size ( $n$ ) for each experimental group/condition, given as a discrete number and unit of measurement                                                                                                                                    |
| <input type="checkbox"/>            | <input checked="" type="checkbox"/> A statement on whether measurements were taken from distinct samples or whether the same sample was measured repeatedly                                                                                                                                    |
| <input type="checkbox"/>            | <input checked="" type="checkbox"/> The statistical test(s) used AND whether they are one- or two-sided<br><i>Only common tests should be described solely by name; describe more complex techniques in the Methods section.</i>                                                               |
| <input checked="" type="checkbox"/> | <input type="checkbox"/> A description of all covariates tested                                                                                                                                                                                                                                |
| <input checked="" type="checkbox"/> | <input type="checkbox"/> A description of any assumptions or corrections, such as tests of normality and adjustment for multiple comparisons                                                                                                                                                   |
| <input type="checkbox"/>            | <input checked="" type="checkbox"/> A full description of the statistical parameters including central tendency (e.g. means) or other basic estimates (e.g. regression coefficient) AND variation (e.g. standard deviation) or associated estimates of uncertainty (e.g. confidence intervals) |
| <input type="checkbox"/>            | <input checked="" type="checkbox"/> For null hypothesis testing, the test statistic (e.g. $F$ , $t$ , $r$ ) with confidence intervals, effect sizes, degrees of freedom and $P$ value noted<br><i>Give <math>P</math> values as exact values whenever suitable.</i>                            |
| <input checked="" type="checkbox"/> | <input type="checkbox"/> For Bayesian analysis, information on the choice of priors and Markov chain Monte Carlo settings                                                                                                                                                                      |
| <input checked="" type="checkbox"/> | <input type="checkbox"/> For hierarchical and complex designs, identification of the appropriate level for tests and full reporting of outcomes                                                                                                                                                |
| <input checked="" type="checkbox"/> | <input type="checkbox"/> Estimates of effect sizes (e.g. Cohen's $d$ , Pearson's $r$ ), indicating how they were calculated                                                                                                                                                                    |

*Our web collection on [statistics for biologists](#) contains articles on many of the points above.*

### Software and code

Policy information about [availability of computer code](#)

Data collection

The Topspin 3.5 pl6 has been used for the analysis of the NMR data. The MXCuBE v3 was used at BioMAX/MAX IV.

Data analysis

OriginPro 2021 (academic) has been used for graphics and statistical analyses. The Chromeleon 6.80 SR10 software has been used to analyse HPAEC data. The Topspin 3.5 pl6 has been used for the analysis of the NMR data. The following programs have been used for the structural analyses: The PyMol software version 2.2.0 has been used for the structural analyses and molecular rendering. AlphaFold modelling was performed using ColabFold v1.5.2. Phasing was performed with the phaser version included in the phenix package (v.1.19.2-4158); The structures were refined using phenix.refine included in the phenix package version 1.19.2-4158 and manually rebuilt using Coot61 v0.9. The manual model was analysed using MolProbity, using phenix package version 1.19.2-4158. Identification of closest structural characterized orthologues were done using the Dali server. The Protparam tool was used for protein sequence analysis. SignalP 5.0, PSORTb (v.3.0.3), and TMHMM (v.2.0) were used for signal peptide prediction. BlastP was used for protein sequence search and retrieval. The CD-HIT server has been used to reduce redundancy of sequences. MAFFT was used for sequence alignment. Structure-guided protein sequence alignments were performed using PROMALS3D. The phylogenetic analysis was performed using NGphylogeny and rendered using iTOL v6. The visualization of amino acid conservation was made using Seq2Logo v2.0. The PATRIC database v.3.6.12 was used to search metagenome data.

For manuscripts utilizing custom algorithms or software that are central to the research but not yet described in published literature, software must be made available to editors and reviewers. We strongly encourage code deposition in a community repository (e.g. GitHub). See the Nature Portfolio [guidelines for submitting code & software](#) for further information.

## Data

Policy information about [availability of data](#)

All manuscripts must include a [data availability statement](#). This statement should provide the following information, where applicable:

- Accession codes, unique identifiers, or web links for publicly available datasets
- A description of any restrictions on data availability
- For clinical datasets or third party data, please ensure that the statement adheres to our [policy](#)

The atomic coordinates of AmGH29A and AmGH181 have been deposited in the Protein Data Bank (<https://www.rcsb.org>) under the PDB accessions 8AYR as well as 8XI, 8AXS and 8XT, respectively (see also Supplementary Information Tables 15 and 16). The GenPept accession IDs of the enzymes characterised in the study are enlisted in Supplementary Table 1. All the data are available from the corresponding authors upon request. Source data are provided with this paper as Supplementary Data file.

## Human research participants

Policy information about [studies involving human research participants and Sex and Gender in Research](#).

|                             |                                                                               |
|-----------------------------|-------------------------------------------------------------------------------|
| Reporting on sex and gender | <input type="text" value="Irrelevant as no human participants are included"/> |
| Population characteristics  | <input type="text" value="Irrelevant"/>                                       |
| Recruitment                 | <input type="text" value="Irrelevant"/>                                       |
| Ethics oversight            | <input type="text" value="Irrelevant"/>                                       |

Note that full information on the approval of the study protocol must also be provided in the manuscript.

## Field-specific reporting

Please select the one below that is the best fit for your research. If you are not sure, read the appropriate sections before making your selection.

- Life sciences       Behavioural & social sciences       Ecological, evolutionary & environmental sciences

For a reference copy of the document with all sections, see [nature.com/documents/nr-reporting-summary-flat.pdf](https://www.nature.com/documents/nr-reporting-summary-flat.pdf)

## Life sciences study design

All studies must disclose on these points even when the disclosure is negative.

|                 |                                                                                                                                                                                                                                                                                                                                                                                                                                                                                                                                                                                                                                                         |
|-----------------|---------------------------------------------------------------------------------------------------------------------------------------------------------------------------------------------------------------------------------------------------------------------------------------------------------------------------------------------------------------------------------------------------------------------------------------------------------------------------------------------------------------------------------------------------------------------------------------------------------------------------------------------------------|
| Sample size     | <input type="text" value="Most analyses were performed in independent triplicate or less frequently duplicate experiments, as deemed sufficient to give a reliable error estimate. The NMR analyses were performed in a single experiment, as the output from this is sufficient to determine the mechanism with the control included. The LC-MS analyses were performed in a single replicate due the large number of glycans analyses, which would include sufficient redundancy to give reliable data. Similarly activity on conjugated P-selectin gave sufficient information to confirm the LC-MS data with regard to enzyme regio-selectivity."/> |
| Data exclusions | <input type="text" value="No data were excluded"/>                                                                                                                                                                                                                                                                                                                                                                                                                                                                                                                                                                                                      |
| Replication     | <input type="text" value="Independent triplicate or less frequently duplicate experiments were performed, except for the NMR and the LC-ESI/MS experiments, as explained above. This is indicated in Table and Figure legends."/>                                                                                                                                                                                                                                                                                                                                                                                                                       |
| Randomization   | <input type="text" value="No animal or human subjects were involved, and the randomisation of data was not relevant."/>                                                                                                                                                                                                                                                                                                                                                                                                                                                                                                                                 |
| Blinding        | <input type="text" value="No animal or human subjects were involved, and blinding was not relevant."/>                                                                                                                                                                                                                                                                                                                                                                                                                                                                                                                                                  |

## Reporting for specific materials, systems and methods

We require information from authors about some types of materials, experimental systems and methods used in many studies. Here, indicate whether each material, system or method listed is relevant to your study. If you are not sure if a list item applies to your research, read the appropriate section before selecting a response.

## Materials &amp; experimental systems

| n/a                                 | Involvement                                                     |
|-------------------------------------|-----------------------------------------------------------------|
| <input type="checkbox"/>            | <input checked="" type="checkbox"/> Antibodies                  |
| <input checked="" type="checkbox"/> | <input type="checkbox"/> Eukaryotic cell lines                  |
| <input checked="" type="checkbox"/> | <input type="checkbox"/> Palaeontology and archaeology          |
| <input type="checkbox"/>            | <input checked="" type="checkbox"/> Animals and other organisms |
| <input checked="" type="checkbox"/> | <input type="checkbox"/> Clinical data                          |
| <input checked="" type="checkbox"/> | <input type="checkbox"/> Dual use research of concern           |

## Methods

| n/a                                 | Involvement                                     |
|-------------------------------------|-------------------------------------------------|
| <input checked="" type="checkbox"/> | <input type="checkbox"/> ChIP-seq               |
| <input checked="" type="checkbox"/> | <input type="checkbox"/> Flow cytometry         |
| <input checked="" type="checkbox"/> | <input type="checkbox"/> MRI-based neuroimaging |

## Antibodies

Antibodies used

Primary antibodies: mouse IgG anti-Lewis antigen (Sigma–Aldrich); IgG anti-Blood Group Lewis A (7LE) (Santa Group Biotechnology, cat log: sc-51512); IgM anti-Blood Group Lewis B (T218) (Santa Group Biotechnology, cat log: sc-59470); IgM anti-Lewis X antibody: CD15 (C3D-1) (Santa Cruz Biotechnology, sc-19648); IgM anti-Blood Group Lewis Y (F3) (abcam, cat log: ab 3359).  
The secondary antibodies: HRP-conjugated poly-clonal goat anti-mouse IgM (Sigma–Aldrich); goat antibodies for Lewis A: Peroxidase goat anti-mouse IgG, F(ab')<sub>2</sub> (Jackson ImmunoResearch, cat log: 115-035-006) and for Lewis B, X and Y: Peroxidase goat anti-mouse IgM antibody (Sigma-Aldrich A-8786).

Validation

All antibodies were validated by manufacturers.

## Animals and other research organisms

Policy information about [studies involving animals](#); [ARRIVE guidelines](#) recommended for reporting animal research, and [Sex and Gender in Research](#)

Laboratory animals

Irrelevant

Wild animals

Irrelevant

Reporting on sex

Irrelevant

Field-collected samples

Irrelevant

Ethics oversight

Irrelevant

Note that full information on the approval of the study protocol must also be provided in the manuscript.
