# Supplementary material for: Sialidases and fucosidases of Akkermansia muciniphila are crucial for growth on mucin and nutrient sharing with mucus-associated gut bacteria
Source: Springer Nature journal article supplement (doi:10.1038/s41467-023-37533-6), 2023-04-01
Supplement: MOESM1 [file 41467_2023_37533_MOESM1_ESM.pdf]

## **Supplementary Figures:**

**Supplementary Fig. 1:** Modular organisation and sequence comparison of *A. muciniphila* fucosidases

**Supplementary Fig. 2:** Modular organisation of characterised GH29 and GH95 fucosidases

**Supplementary Fig. 3:** Phylogenetic clustering of *A. muciniphila* GH29 and GH95 fucosidases

**Supplementary Fig. 4:** Activity of *A. muciniphila* fucosidases on model oligosaccharides

**Supplementary Fig. 5:** Activity profiles of *A. muciniphila* fucosidases on selected mucin O-glycans and N-glycans

**Supplementary Fig. 6:** Fucosidase activity on defined O-glycoprotein conjugated Lewis epitopes

**Supplementary Fig. 7:** Modular organization and phylogeny of *A. muciniphila* sialidases

**Supplementary Fig. 8:** Sialidase activity on oligosaccharides

**Supplementary Fig. 9:** Sialidase activity on sialylated mucin O-glycan motifs and immunoglobulin G N-glycans

**Supplementary Fig. 10:** Cobra strike pose architecture and putative binding domains of AmGH29D

**Supplementary Fig. 11:** Comparison of the AlphaFold model of AmGH29C and the crystal structure of AmGH29D

**Supplementary Fig. 12:** Phylogenetic tree of GH181 as well as active site and surface binding site motif conservation

**Supplementary Fig. 13:** Architecture of AmGH181 and comparison to GH33 sialidases

**Supplementary Fig. 14:** Catalytic site signatures of AmGH181 as compared to the closest GH33 sialidase

**Supplementary Fig. 15:** The NMR analysis of the inverting mechanism of AmGH181

**Supplementary Fig. 16:** Ligand binding at the active site and secondary surface binding sites of AmGH181

**Supplementary Fig. 17:** Binding of *A. muciniphila* fucosidases and sialidases to mucin

**Supplementary Fig. 18:** Localisation of fucosidase and sialidase activities of *A. muciniphila*

**Supplementary Fig. 19:** Growth of butyrate-producing Clostridia on monosaccharides

**Supplementary Fig. 20:** Cross-feeding of butyrate-producing Clostridia in *A. muciniphila* co-cultures on mucins with different degree of sialylation

## **Supplementary Tables:**

**Supplementary Table 1:** Enzyme names and primers

**Supplementary Table 2:** Kinetics parameters of *A. muciniphila* fucosidases

**Supplementary Table 3:** Number of assigned *O*- and *N*-glycan structures studied in this work

**Supplementary Table 4:** Fucosidase relative activity towards porcine gastric, colonic mucin and fetuin

**Supplementary Table 5:** Normalized activity of *A. muciniphila* fucosidases on HMOs, mucins and fetuin

**Supplementary Table 6:** Activity profiles of *A. muciniphila* sialidases on porcine colonic mucin *O*-glycans

**Supplementary Table 7:** Normalised activities of *A. muciniphila* sialidases on HMOs and attached *O*-glycans from mucin and fetuin

**Supplementary Table 8:** The top structural orthologues of AmGH29D

**Supplementary Table 9:** The top structural orthologues of AmGH181

**Supplementary Table 10:** The top structural orthologues of the CBM-like domain of AmGH181

**Supplementary Table 11:** Inhibition of *A. muciniphila* fucosidases by 1-Deoxyfuconojirimycin (DFJ)

**Supplementary Table 12:** Inhibition of *A. muciniphila* sialidases by 2,3-dehydro-2-deoxy-*N*-acetylneuraminic acid (DANA)

**Supplementary Table 13:** The effect of fucosidase and sialidase inhibition on growth of *A. muciniphila* on PCM

**Supplementary Table 14:** Prevalence of fucosidase and sialidase genes in *A. muciniphila* genomes

**Supplementary Table 15:** Data collection and refinement statistics for AmGH29D

**Supplementary Table 16:** Data collection and refinement statistics for AmGH181

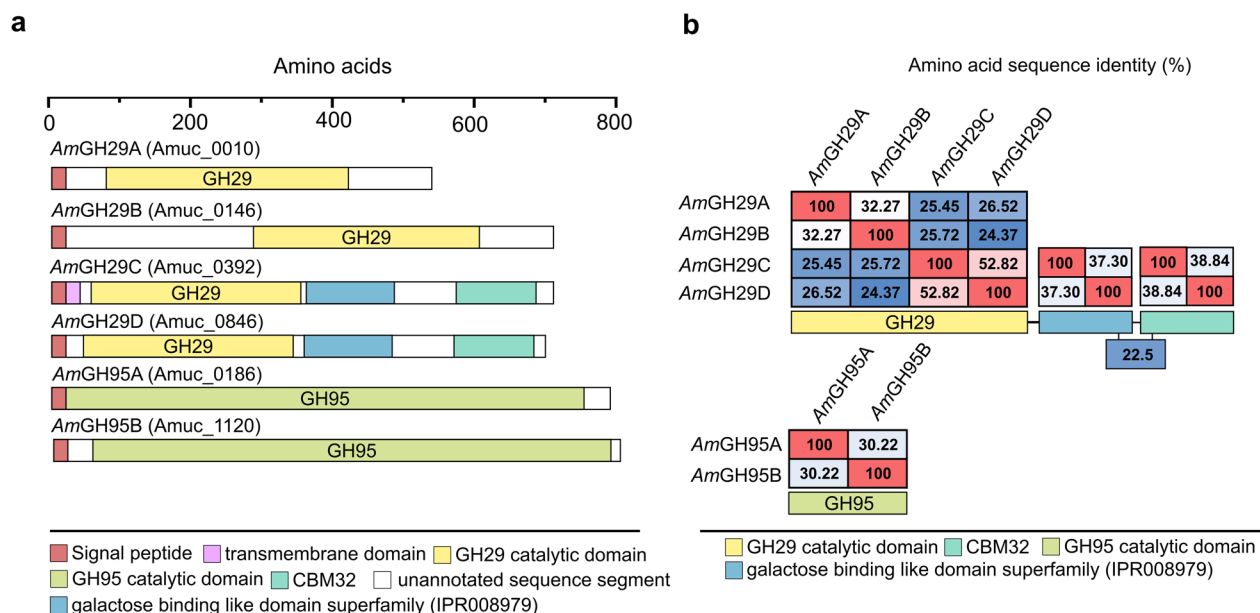

**Supplementary Fig. 1: Modular organisation and sequence comparison of *A. muciniphila* GH29 and GH95.** **a**, Size and modular organisation based on annotations by CAZy, dbCAN meta server, InterPro, and signal peptide predictions using SignalP (v.5.0). **b**, Amino acid sequence identity matrix showing the evolutionary relationships amongst the catalytic modules of *A. muciniphila* GH95 and GH29 enzymes and well as within the putative CBMs of the *A. muciniphila* GH29s.

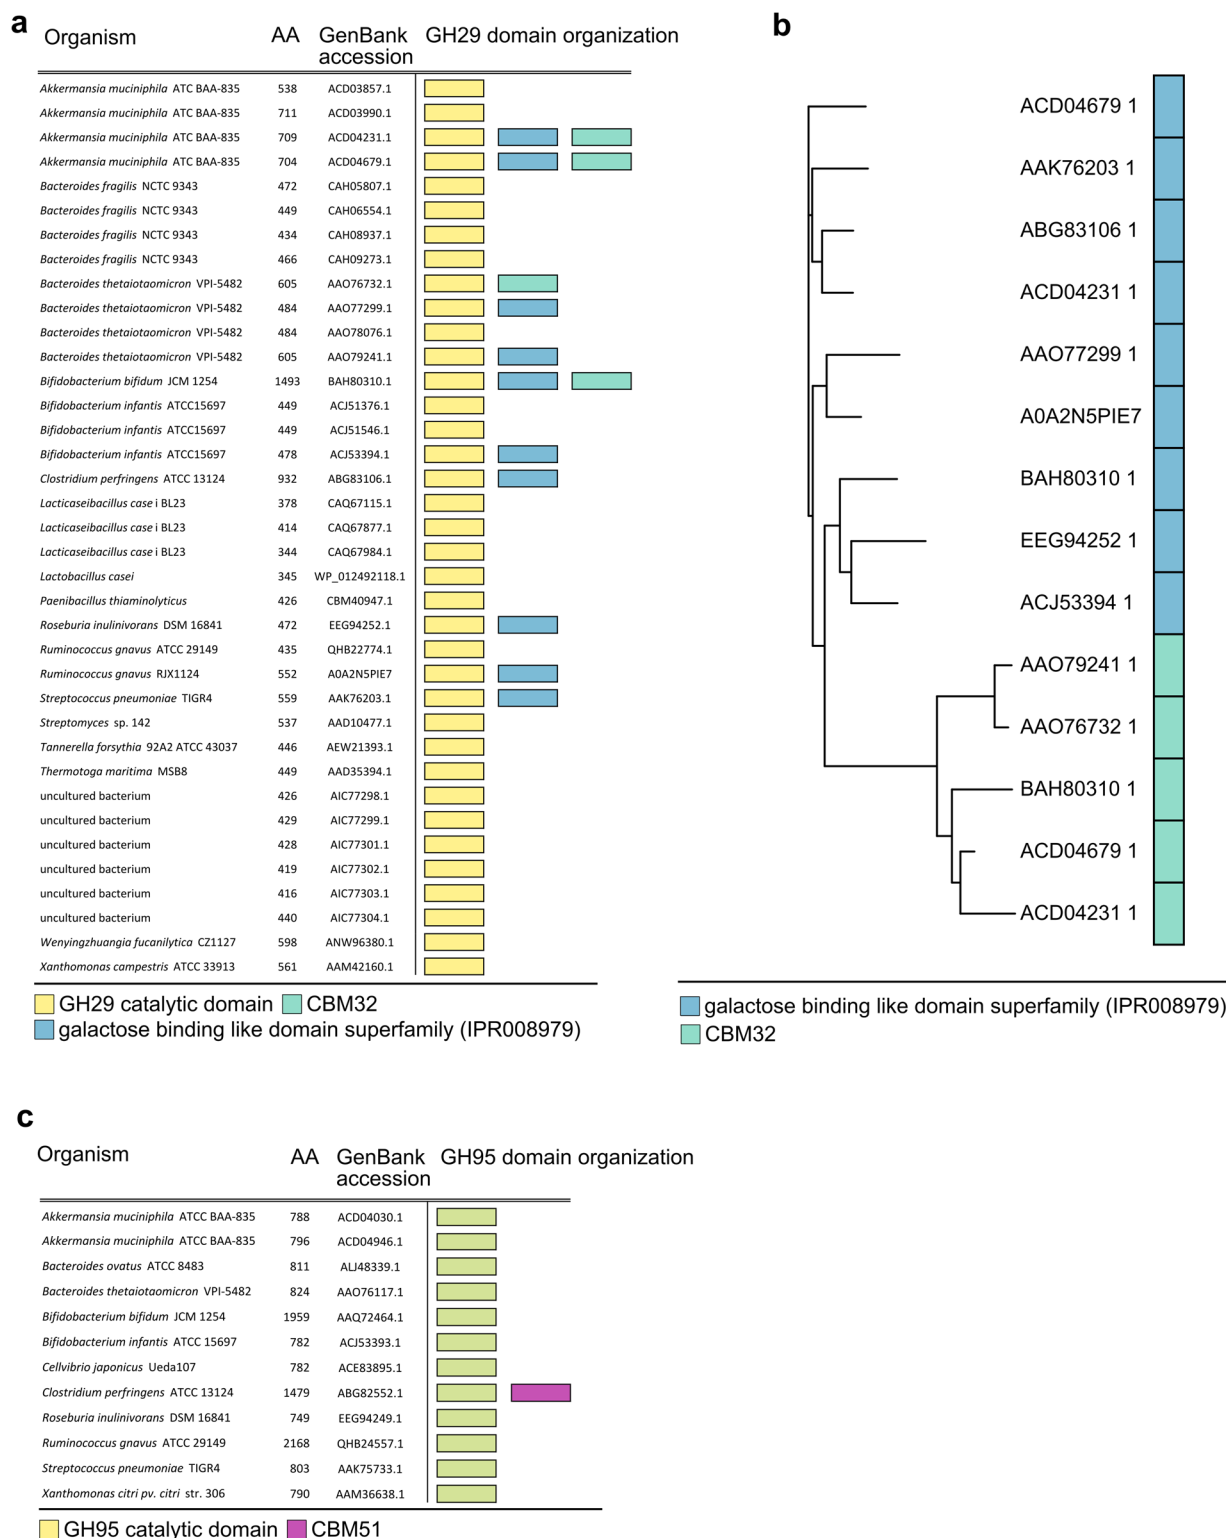

**Supplementary Fig. 2: Modular organisation of characterized GH29 and GH95 fucosidases. a,** Size and domain organisation of the four *A. muciniphila* GH29s and of previously characterized GH29 enzymes. **b,** Phylogenetic analysis showing the segregation of the galactose-binding-like domains and the CBM32 that occur in previously characterized GH29s and in *A. muciniphila* GH29 enzymes described in the present study. **c,** Size and modular organization of the two *A. muciniphila* GH95 fucosidases and of hitherto characterized GH95 enzymes. Domain annotations are from CAZy, dbCAN meta server and InterPro.



a

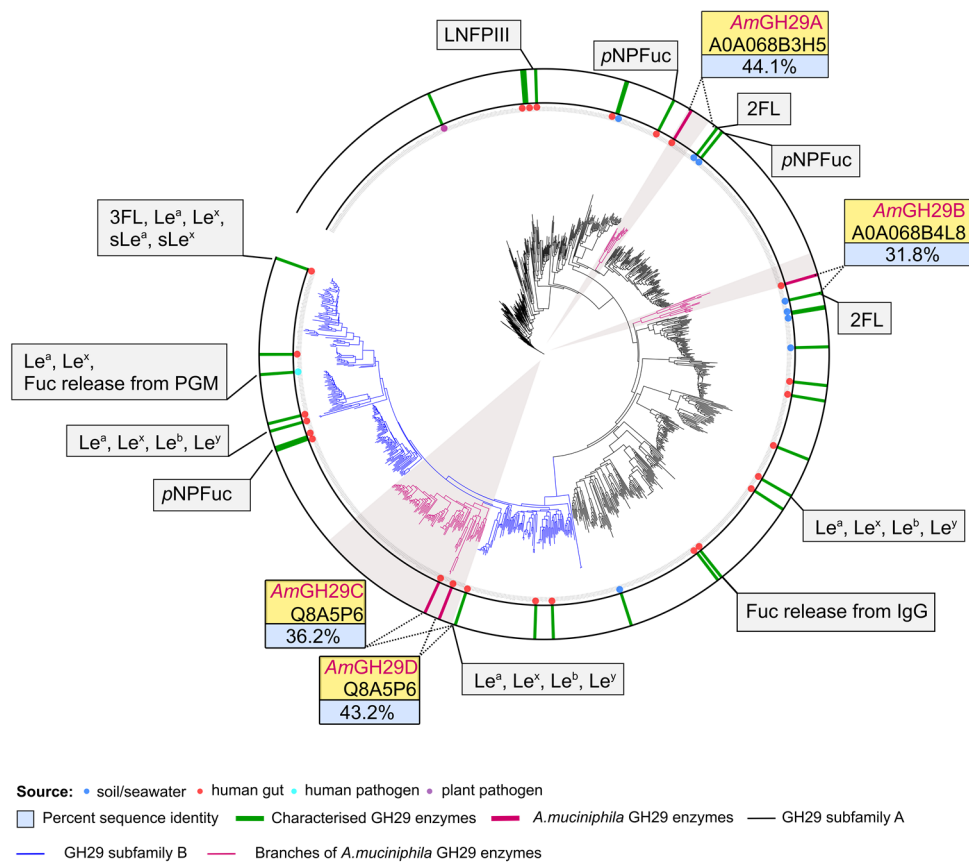

b

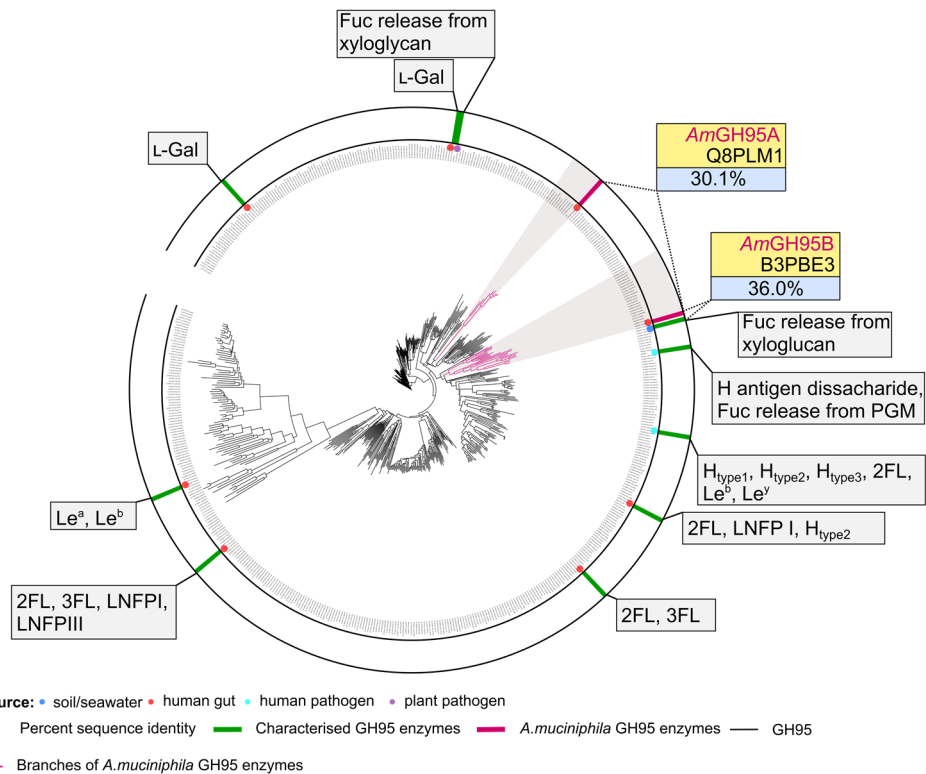

**Supplementary Fig. 3: Phylogenetic clustering of the *A. muciniphila* GH29 and GH95 fucosidases.** **a**, Phylogenetic tree of 1117 putative GH29 sequences. **b**, Phylogenetic tree of 543 putative GH95 sequences. Characterized GH29s and GH95s (as defined in CAZy) are green stripes, *A. muciniphila* GH29 and GH95 enzymes are in magenta stripes. *A. muciniphila* fucosidases and their closest characterized orthologues (indicated with their UniProt IDs) are in yellow boxes and the amino acid sequence identities between their catalytic modules are in the blue box. The source niches of the described fucosidases are indicated by coloured circles and the substrates the enzymes have been shown to be active on are shown. The sequences belonging to GH29 subfamily A (high activity on pNPFuc) and B (low activity on pNPFuc) are in black and blue, respectively. The branches populated by the *A. muciniphila* enzymes are in pink and highlighted by a grey shadow.

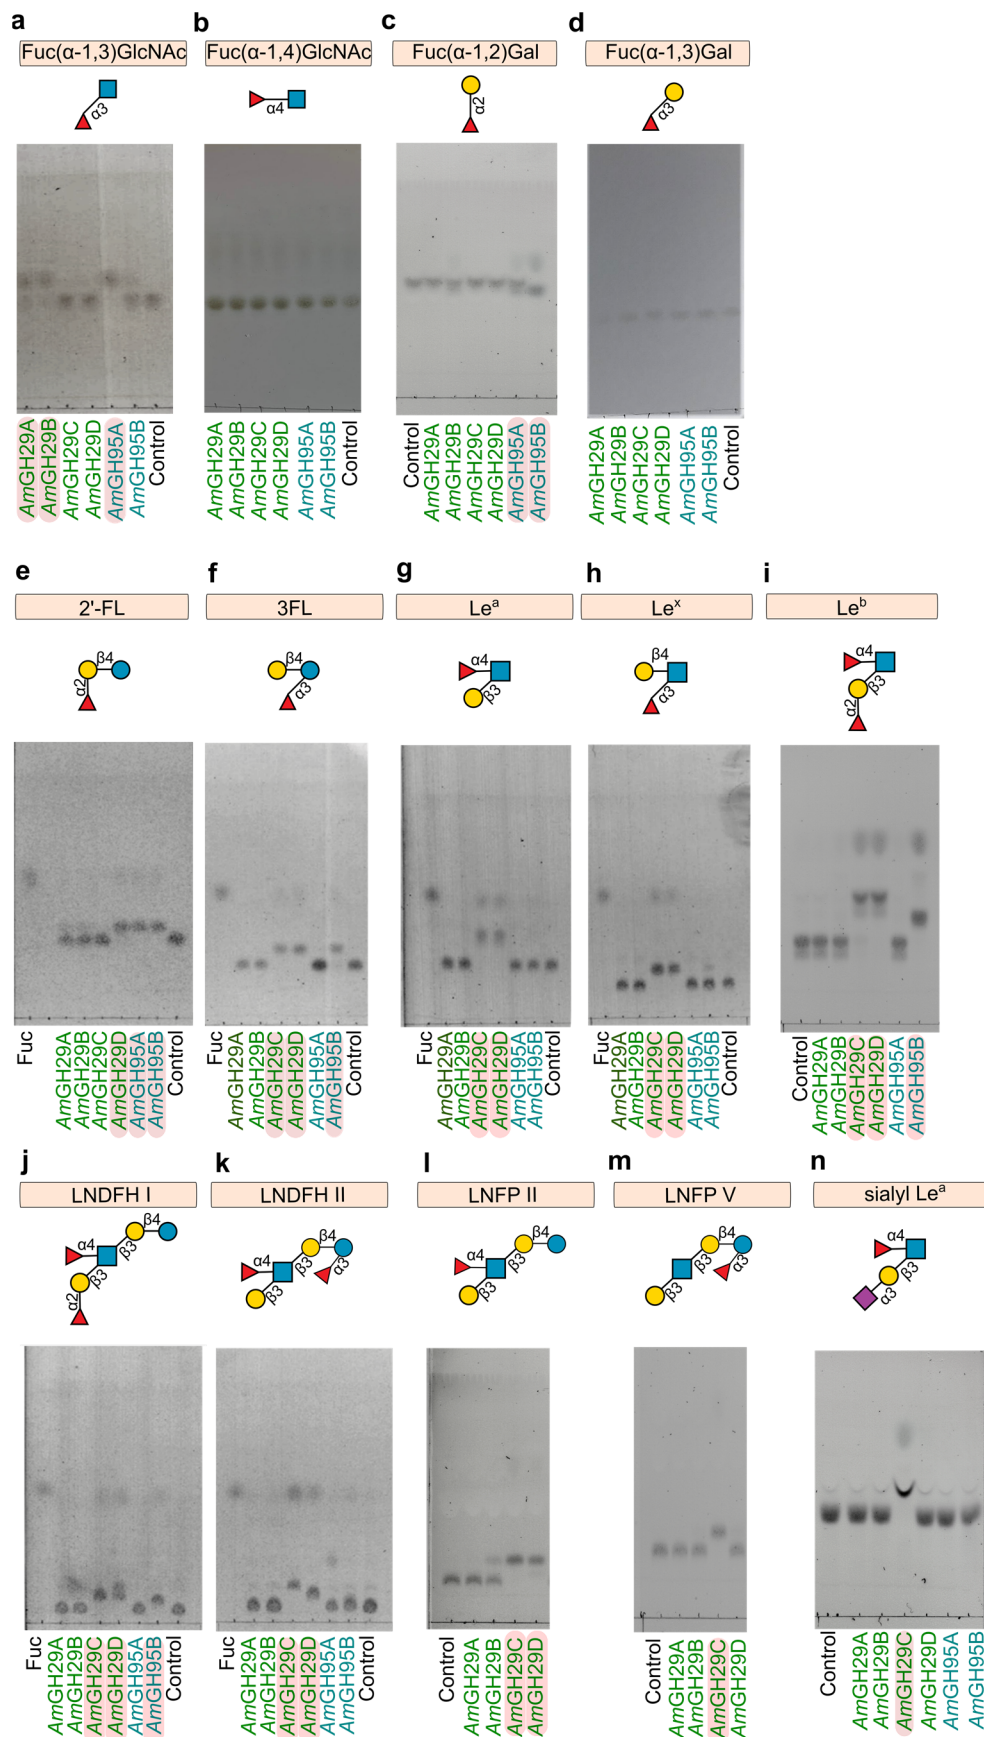

**Supplementary Fig. 4: The activity of *A. muciniphila* fucosidases on model oligosaccharides. a-n,** Fucosidase activity analysed using thin layer chromatography on di- and oligosaccharides using 2 mM substrate, 0.5  $\mu$ M enzyme, pH 6.8 at 37  $^{\circ}$ C for 1 h. The enzymes that display activity are highlighted by a pink box. The data were from 3 independent experiments (n=3), whereby the triplicate analyses yielded similar results. Source data are provided as a Source Data file labelled with the corresponding figure number and panel definition.



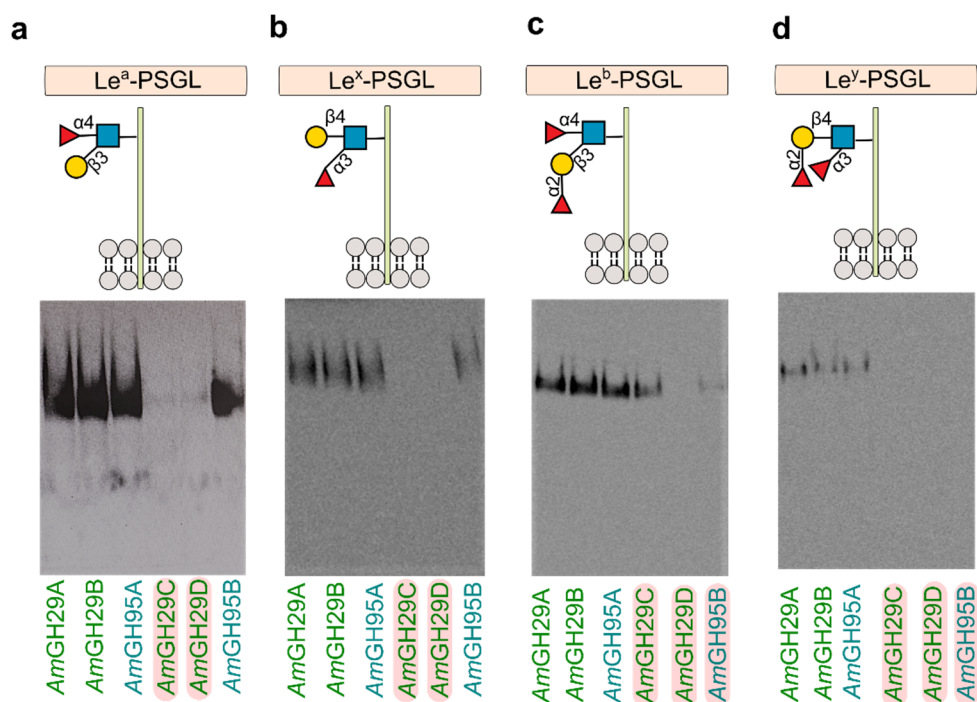

**Supplementary Fig. 6: Fucosidase activity on defined O-glycoprotein conjugated Lewis epitopes.** a-d, Fucosidase activity is observed as a decrease/loss of Western blot signal on defined conjugated Lewis epitopes presented by the recombinant glyco-engineered P-selectin glycoprotein ligand-1 (PSGL1) from engineered CHO cells. Each enzyme (2  $\mu$ M) was incubated with beads carrying PSGL-1 glycoprotein (displaying a specific Le antigens) in 20 mM HEPES buffer 150 mM NaCl pH 6.8 at 37  $^{\circ}$ C for 3 h in 50  $\mu$ l. The beads were boiled in presence of SDS-loading buffer containing 25 mM DTT for 10 min at 95 $^{\circ}$ C and western blot analysis was performed (see materials and methods). For simplicity, only the defined Lewis epitopes of the native protein O-glycome are shown. The enzymatic activity is monitored by the loss of Western blot signal originating from specific Le-epitope antibodies after enzyme incubation. The cleavage of a fucosyl would be observed as a loss/decrease of signal due to the large decrease/abolished binding of the antibody. Inactive enzymes serve also as negative controls as they show independently the full-signal, whereas the active enzymes serve as positive controls, showing signal level when the motif is depleted. The data are from a single (n=1) experiment. Source data are provided as a Source Data file labelled with the corresponding figure number and panel definition.

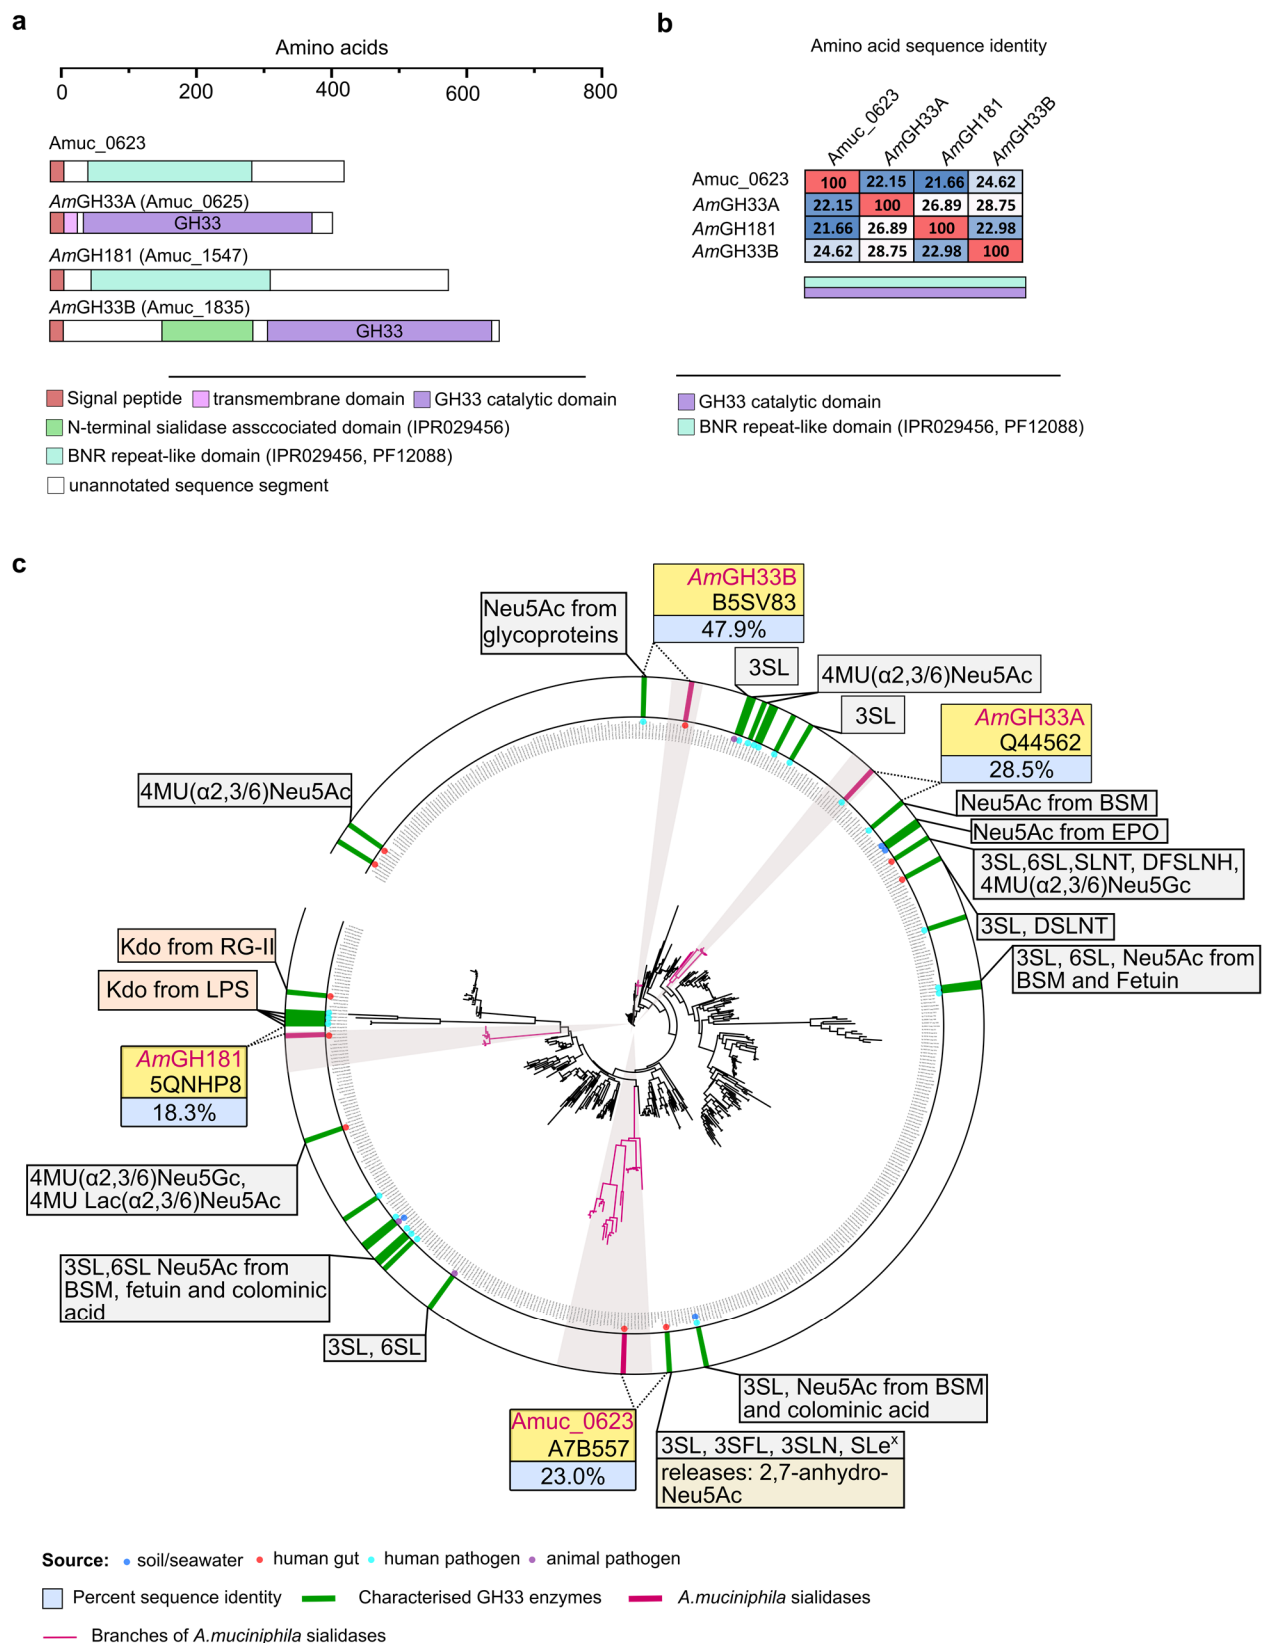

**Supplementary Fig. 7: Modular organization and phylogeny of *A. muciniphila* sialidases.** **a**, Modular organization of *A. muciniphila* assigned GH33 sialidases and distant orthologues with BNR-like domains, considered a sialidase signature. **b**, Amino acid sequence identity matrix for the sequences in **a**. **c**, Phylogenetic tree of 534 putative sialidase sequences (GH33 enzymes and BNR-like domain enzymes from the sequences in **a** and **b**). *A. muciniphila* sialidases and their closest characterized orthologues (indicated with their UniProt IDs) are in yellow boxes and the amino acid sequence identities between their catalytic modules are in the blue box. The source organism niches of the described sialidases are indicated by coloured circles and substrates that enzymes have been shown to be active on are shown. The branches populated by the *A. muciniphila* enzymes are in pink and highlighted by a grey shadow. Characterized GH33 enzymes previously shown to release 2,7-anhydro Neu5Ac are highlighted by a dark yellow box and GH33 enzymes demonstrated to be active on 2-keto-3-deoxy-D-manno-octulosonic acid (Kdo) are highlighted by an orange box.



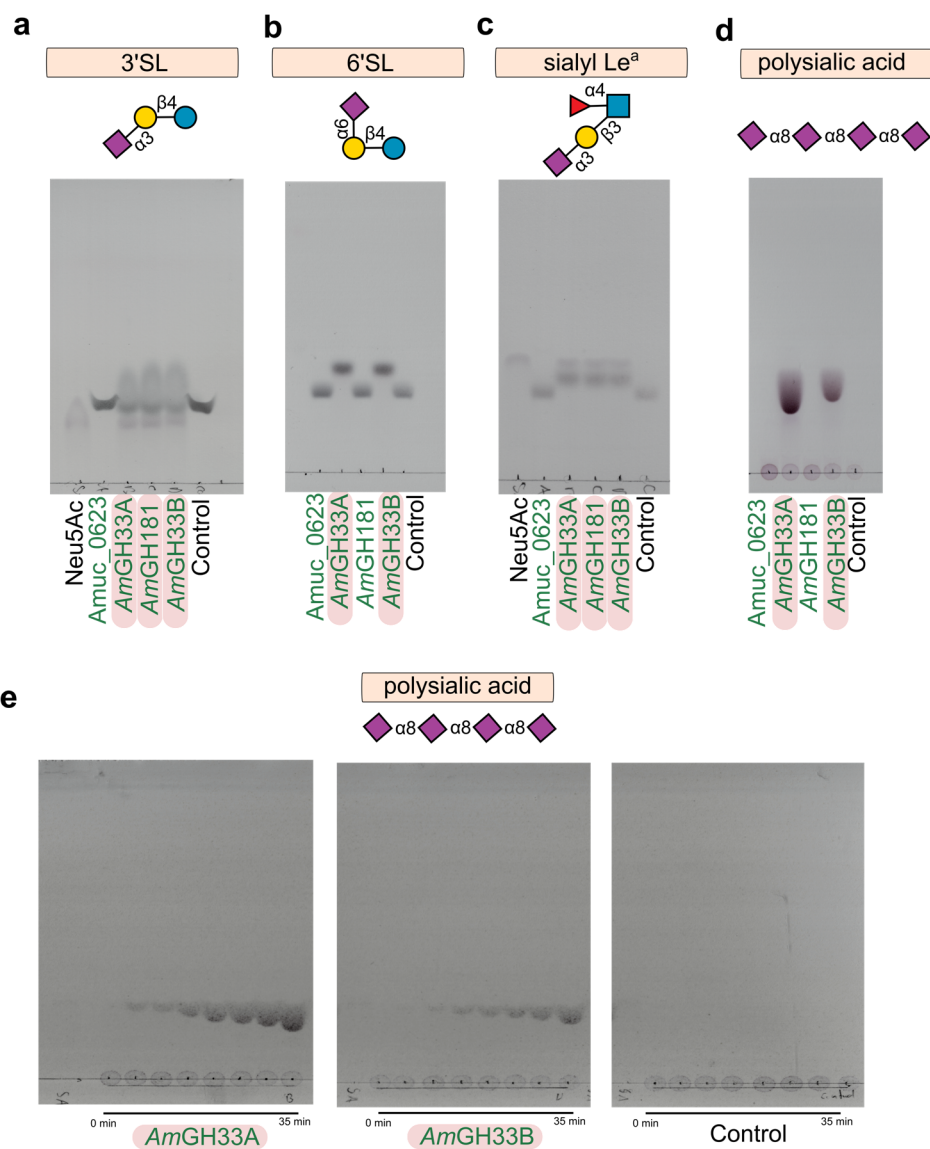

**Supplementary Fig. 8: Sialidase activity on oligosaccharides. a-e,** The sialidase activity on sialyl-substituted oligosaccharides and polysialic acid (Colominic acid) monitored by TLC. Active enzymes are highlighted by pink boxes. Reactions (10  $\mu$ L) were carried out using 2 mM of each substrate, 0.5  $\mu$ M of each enzyme at pH 6.8 at 37  $^{\circ}$ C for 1 h. The data are from three independent experiments (n=3), whereby all analyses yielded similar results. Source data are provided as a Source Data file labelled with the corresponding figure number and panel definition.



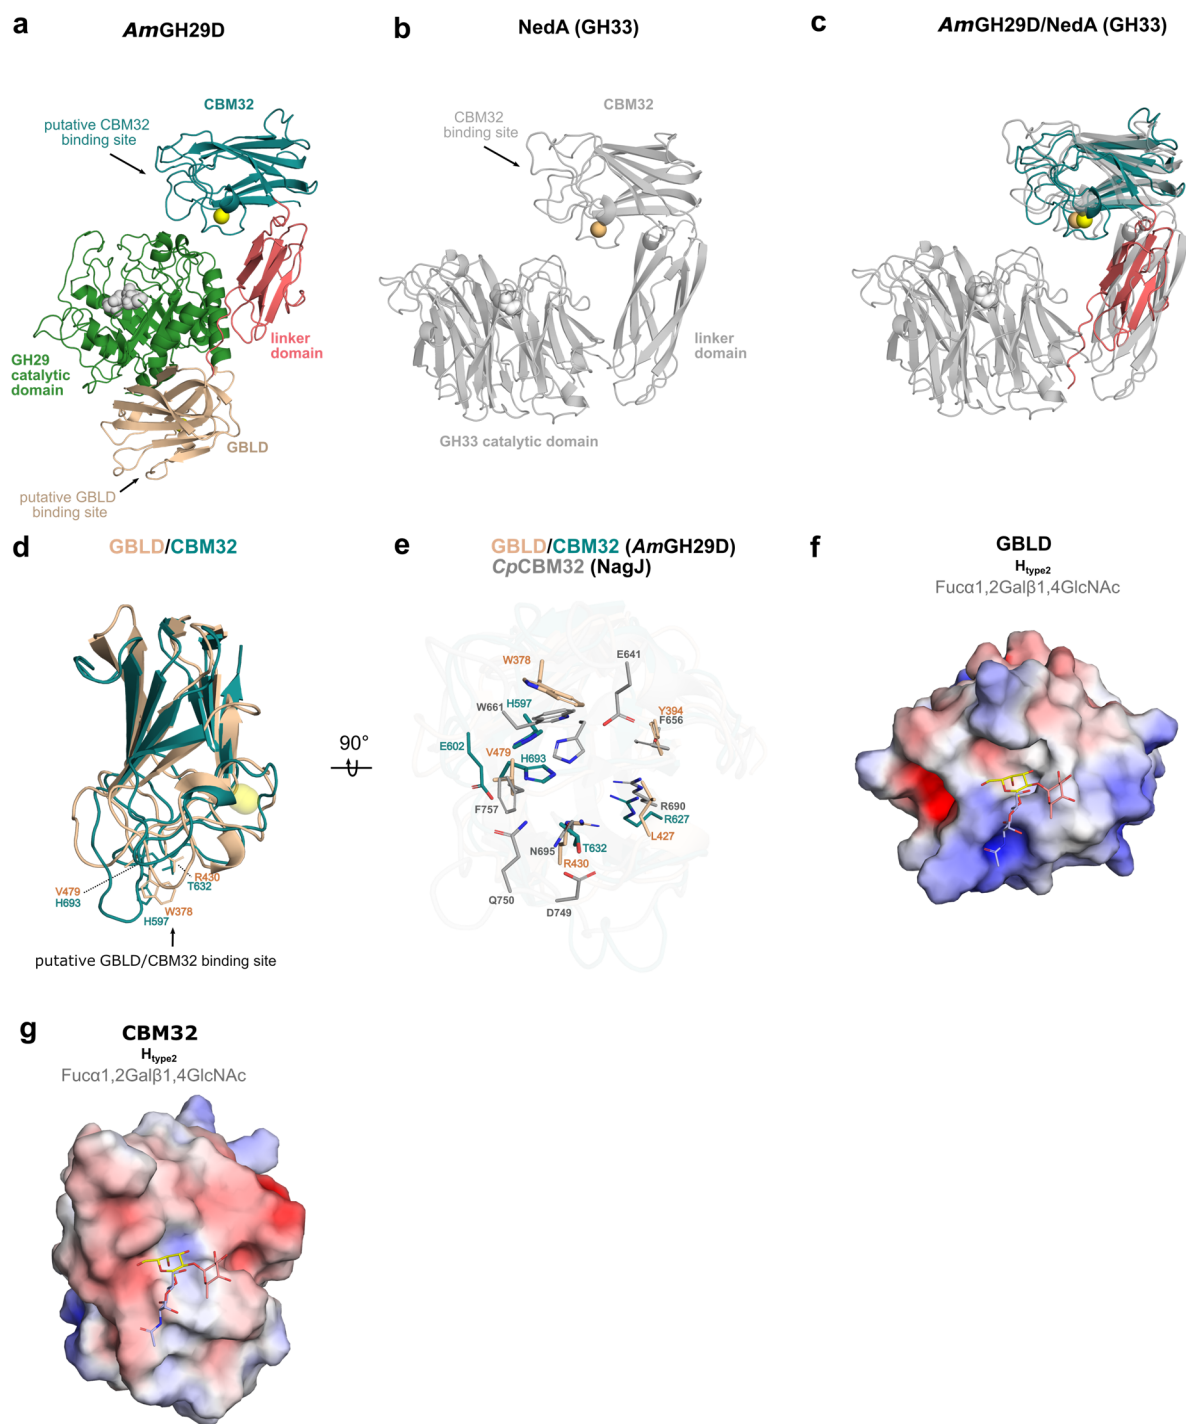

**Supplementary Fig. 10: Cobra strike pose architecture and putative binding domains of AmGH29D.** **a**, Overall structure of AmGH29D consisting of a catalytic ( $\beta/\alpha$ )<sub>8</sub> N-terminal domain (green), a  $\beta$ -sandwich forming the galactose binding like domain (GBLD) (wheat coloured), a linker domain (salmon red) and a putative CBM32 (dark cyan) with a  $\text{Ca}^{2+}$  (yellow sphere) binding site. The inferred catalytic nucleophile D190 and the acid/base E246 are shown as spheres (white). **b**, Overall structure of the *Micromonospora viridifaciens* GH33 sialidase (NedA, PDB: 1WCQ) that displays a similar “Cobra strike pose” architecture as AmGH29D. The catalytic residues are highlighted as spheres (grey) and the bound  $\text{Na}^+$  is shown as orange sphere. **c**, Structural alignment (Dali server) of NedA with the linker and CBM32 domain of AmGH29D showing a similar juxtapositioning above the active site (here dubbed as a Cobra strike pose). **d**, Structural alignment of the GBLD and the CBM32 domains of AmGH29D with the bound  $\text{Ca}^{2+}$  (yellow) and with residues putatively involved in ligand binding represented as sticks. **e**, Comparison of the ligand-binding sites of the biochemically characterized CBM32 from *Clostridium perfringens* (CpCBM32, PDB: 2J7M) with GBLD and the CBM32 from AmGH29D. The analysis shows that the aromatic stacking tryptophan in the previously characterized CBM32 is shared with GBLD, which otherwise possesses more apolar residues in the potential binding site as compared to both CBM32s. **f**, Electrostatic surface representation of the GBLD (generated using the APBS plugin in Pymol) illustrating the apolar surface of the putative binding site. **g**, Electrostatic surface representation of the putative CBM32 showing a more polar putative binding site as compared to the GBLD (g). **(f and g)** The H2 antigen trisaccharide bound in CpCBM32 with fucose shown in pink, *N*-acetylglucosamine in blue and galactose in yellow is also shown in the GBLD and CBM32 from AmGH29D after structural alignment with the CpCBM32 (2J7M) to visualize the putative binding site area.



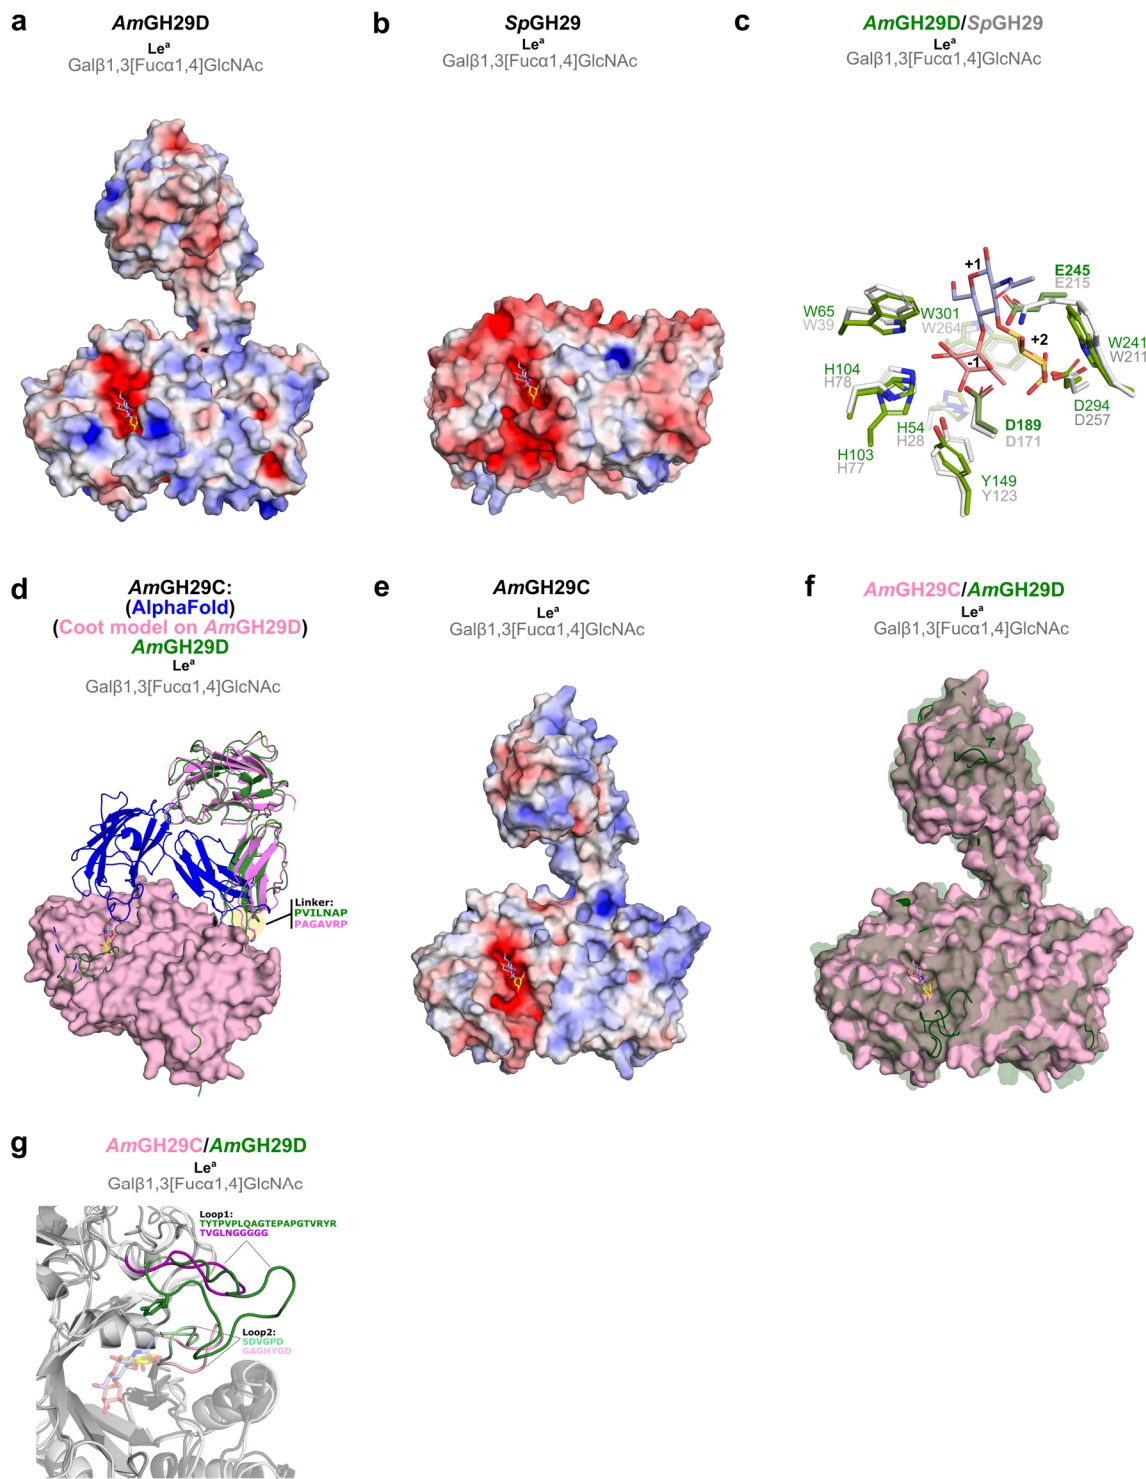

**Supplementary Fig. 11: Comparison of the AlphaFold model of AmGH29C and the crystal structure of AmGH29D.** **a**, Surface electrostatic potential of AmGH29D (APBS plugin in Pymol) showing the negatively charged active site surrounded by positively charged patches. **b**, Surface electrostatic potential of the closest structural orthologue of AmGH29D (*SpGH29*, 6OR4;) showing a negatively charge patch flanking the active site as opposed to AmGH29D. **c**, Stick representation (green) of the AmGH29D active site shows a highly conserved –1 subsite as compared to *SpGH29* (white sticks). The catalytic residues of AmGH29D (D190 and E246) are in bold font. **d**, Superimposition of the AmGH29C AlphaFold model (pink surface (catalytic domain) and the C-terminal GBLD and CBM32 in cartoon), an AmGH29C model build in coot (blue, cartoon) on AmGH29D as a template (blue, cartoon) and AmGH29D (green, cartoon). Amino acid differences in the linker region suggest higher flexibility of AmGH29C than AmGH29D, which may contribute to the possible ridged body movement of the CBM32-linker domains in AmGH29C to position the CBM in a Cobra-bite pose at the side of the active site. **e**, Electrostatic surface representation of the AlphaFold model of AmGH29C. **f**, Superimposition of the AmGH29C Coot model (white solid surface) with AmGH29D (green semi-transparent surface) showing large loops in AmGH29D occluding the active site, potentially hindering the accommodation of larger complex and/or heavily substituted fuco-*O*-glycans. **g**, Superimposition of the AmGH29C AlphaFold model (dark grey, cartoon) with AmGH29D (white, cartoon) highlighting the larger and potentially less flexible loops in AmGH29D (Loop1: dark green, Loop2: light green) restricting the active site as opposed to the shorter and more flexible corresponding loops in AmGH29C (Loop1: dark pink, Loop2: light pink). The structure is shown from a different perspective for clarity.

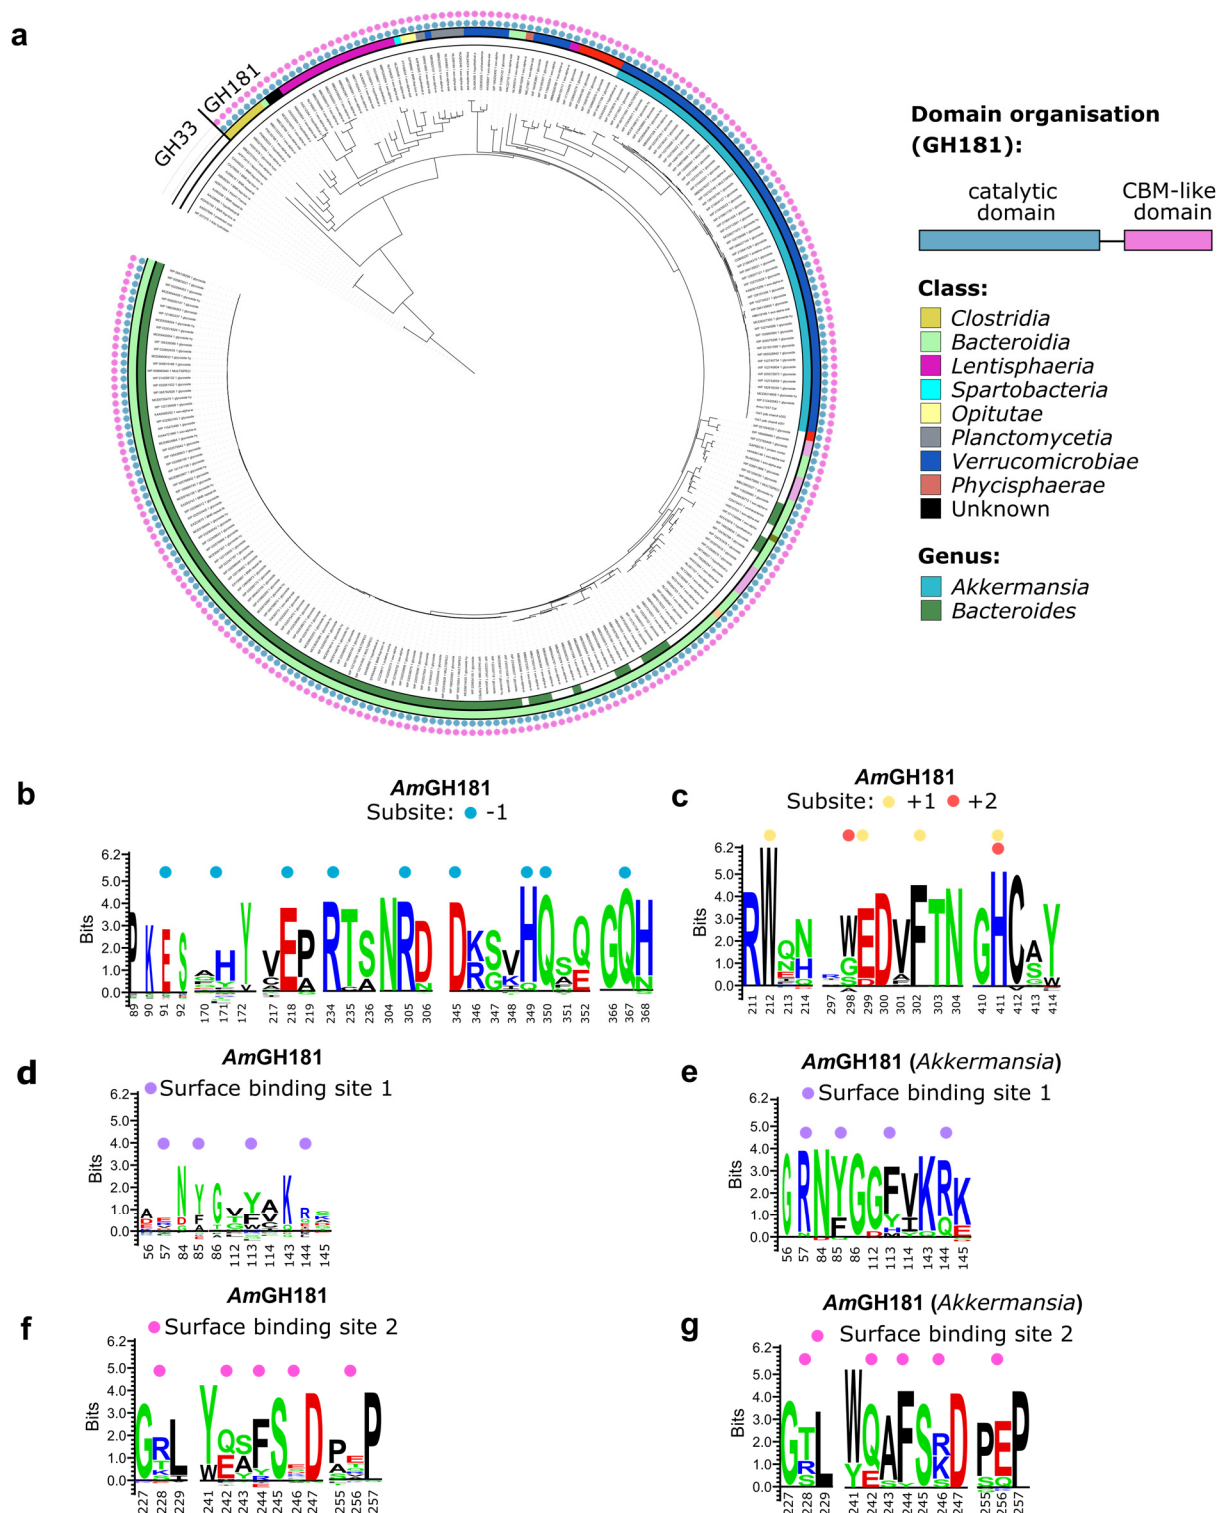

**Supplementary Fig. 12: Phylogenetic tree of GH181 as well as active site and surface binding site motif conservation.** **a**, Phylogenetic tree of 335 GH181 sequences generated using AmGH181 as a query (see Materials and methods section). The modular architecture of the catalytic module and the CBM-like domain is conserved throughout the family and the taxonomic class and genus affiliations of the sequences is shown. **b**, Sequence logo of subsites +1 and +2 subsites. **c**, Sequence logo of subsite -1. **d**, Sequence logo of the putative surface binding site 1 residues across GH181. **e**, same as **d**, but including only GH181 sequences from the *Akkermansia* genus. **f**, Sequence logo of the putative surface binding site 2 across GH181. **g**, same as **f**, but including sequences only from the *Akkermansia* genus.

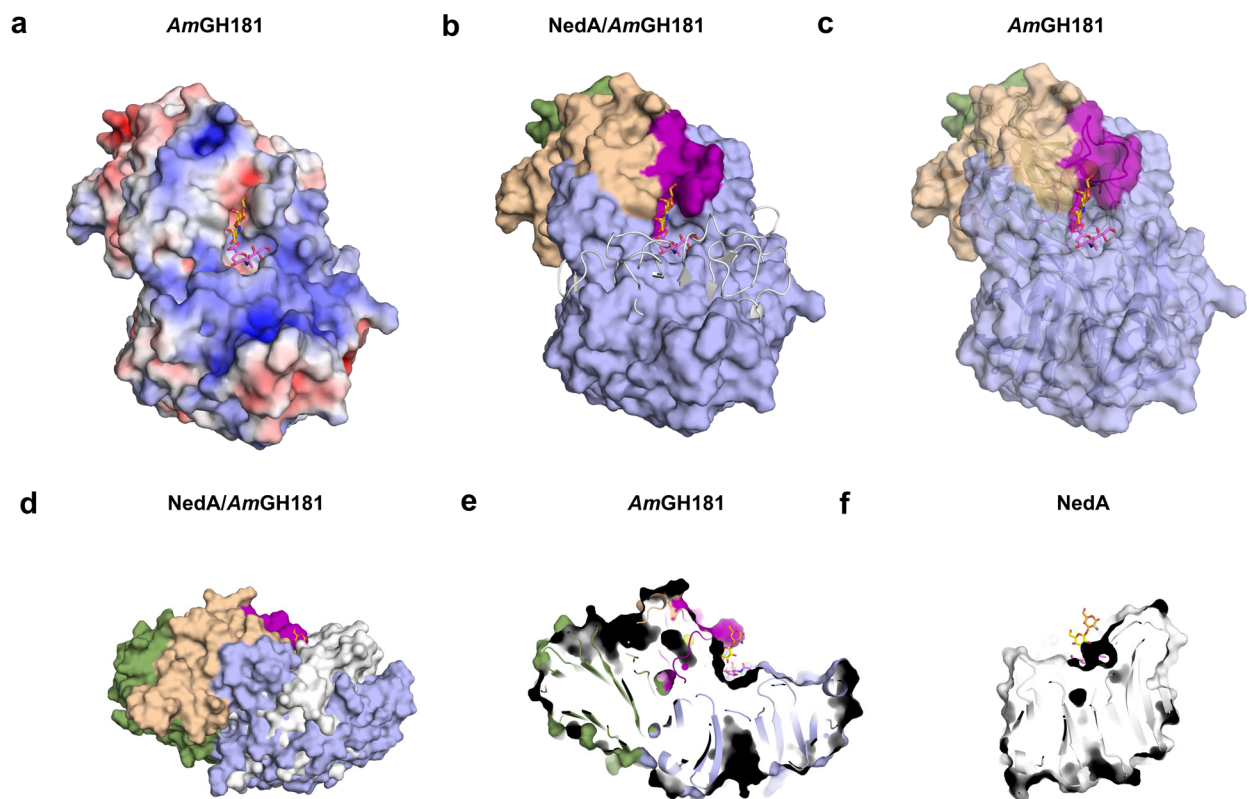

**Supplementary Fig. 13: Architecture of AmGH181 and comparison to GH33 sialidases.** **a**, Electrostatic surface representation of AmGH181 showing positively charged patches surrounding the catalytic site. **b**, Superimposition of AmGH181 with the closest structurally characterized orthologue, the GH33 sialidase NedA from *Micromonospora vificifaciens* (1EUS), showing that the elongated loops that join the strands of the  $\beta$ -propeller in GH33 (grey cartoon) are markedly shortened in AmGH181, resulting in open side of the active site as opposed to NedA. By contrast, longer loops together with the  $\text{Ca}^{2+}$  binding and the B domains pack onto the  $\beta$ -propeller forming the binding site for the T-antigen disaccharide moiety, which lacks in GH33 enzymes. AmGH181 is shown as a surface coloured according to the domains: catalytic domain in light blue,  $\text{Ca}^{2+}$  (yellow sphere) binding domain in violet, B domain in wheat and C-terminal  $\beta$ -sandwich domain in green. **c**, Semi-transparent surface representation of AmGH181 coloured as in **b** showing that the active site of AmGH181 is shaped by the  $\text{Ca}^{2+}$  bindings site, the B domain and two large loops from the catalytic domain. **d**, Superimposition of AmGH181 (solid surface, coloured as in **b**) with NedA (solid surface, white) showing differences in active site architecture. **e**, Same view of AmGH181 as **d** but represented as carved solid surface (coloured as in **b**) highlighting the “sun-chair” architecture of the AmGH181 active site. **f**, Same view of NedA as in **d** but represented as carved solid surface (white) showing the flat surface NedA potentially lacking the aglycone (+) ligand binding sites. Structural alignments of AmGH181 and NedA (panels **b** and **d**) were performed using the DALI server.

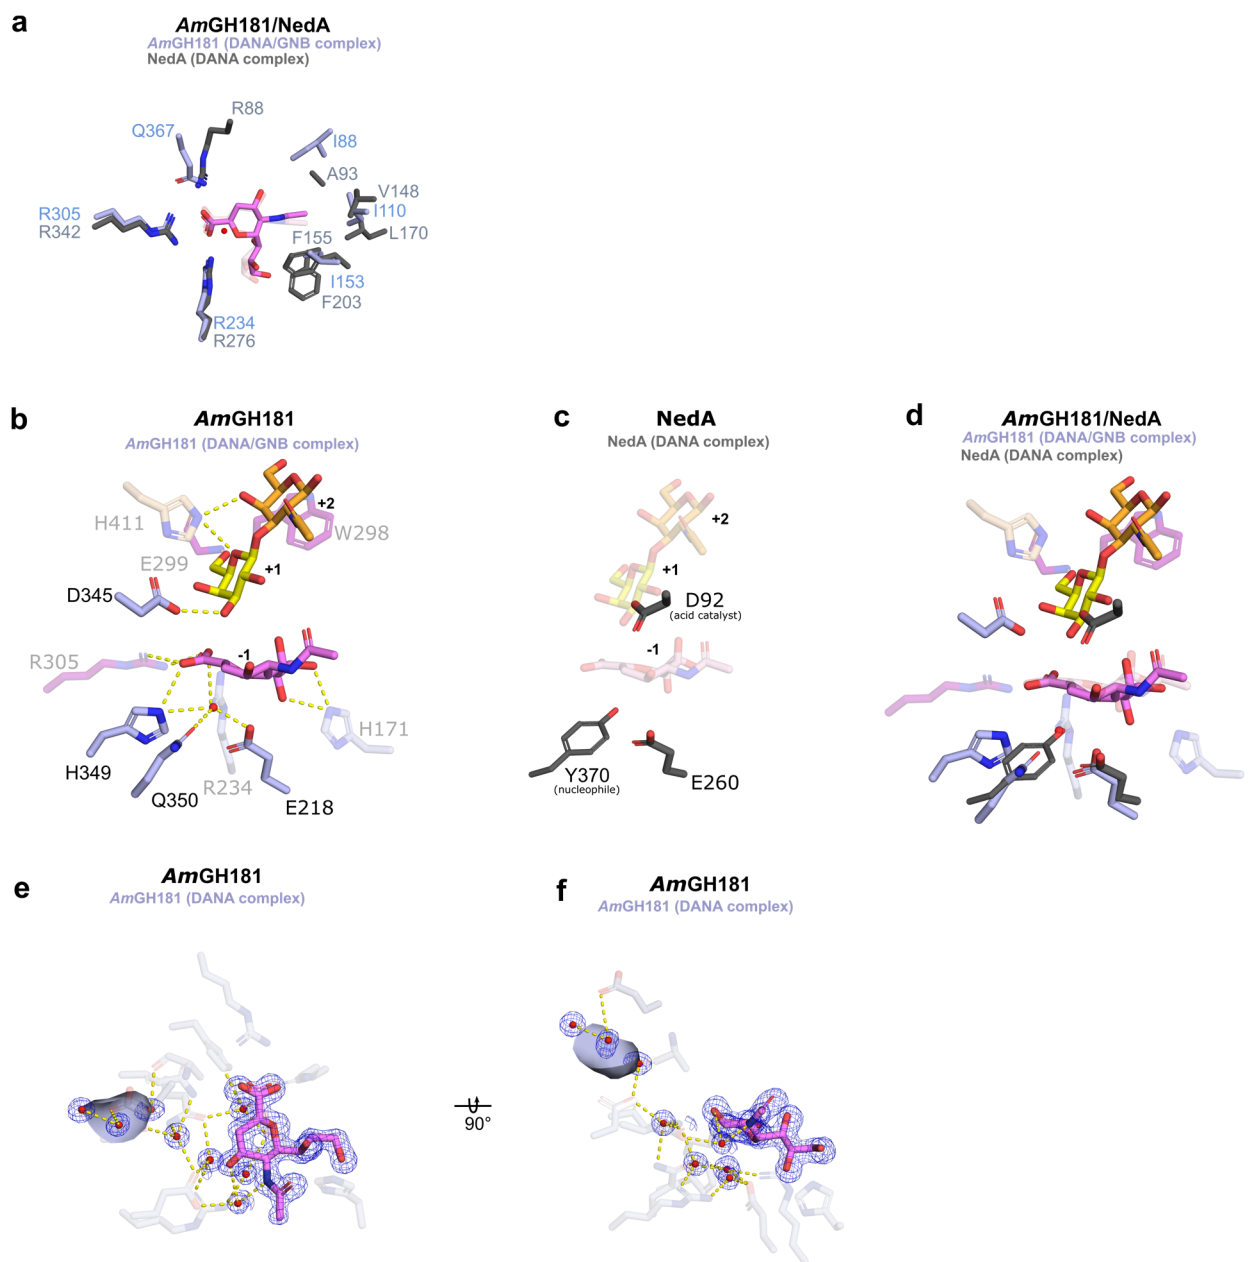

**Supplementary Fig. 14 Catalytic site signatures of AmGH181 as compared to the closest GH33 sialidase.** **a**, Superimposition of the catalytic sites of AmGH181 (light blue sticks, the DANA inhibitor in dark pink, Gal in yellow, GalNAc in dark yellow and an ordered water molecule as red sphere) and NedA, the GH33 from *Micromonospora vificifaciens* (1EUS, grey sticks, the DANA inhibitor in a semi-transparent and light pink). The top view shows that only two of the three arginine residues of the conserved R triad in GH33, are conserved in AmGH181, whereas a glutamine substitutes the third arginine. Residues with similar chemistry flank the *N*-acetyl group of the DANA inhibitor, while two phenylalanines, one of which packs onto the DANA inhibitor in the catalytic site, are lacking in AmGH181 **b**, The catalytic site of AmGH181 showing the recognition of the DANA inhibitor and T-antigen disaccharide (GNB) (stick coloured according to domain, similar to Supplementary Fig. 11b). **c**, The catalytic machinery of the GH33 NedA (stick representation) showing the catalytic tyrosine nucleophile, an adjacent conserved glutamate and the catalytic acid. The DANA and GNB from AmGH181 are also visualized to keep the perspective of the active site. **d**, Superimposition of the AmGH181 catalytic site (same colouring scheme as b) and NedA (grey sticks, DANA in semi-transparent and light pink) showing the substitution of the catalytic nucleophile in GH33 to a glutamine (Q350) in AmGH181, which is preceded by a histidine (H349). These two residues as well as an invariant glutamate (E218) and one of the conserved arginine (R234) are potentially hydrogen bonded to a water molecule (see b) that overlays perfectly with the oxygen in the catalytic tyrosine in GH33 enzymes. This water is positioned for nucleophilic attack at the C2 of the sialyl (or inhibitor) unit. An invariant aspartate (D345) in AmGH181 is hydrogen bonded to the C3-OH group of the bound galactosyl unit at subsite +1 (see b), whereas the general acid/base aspartate in GH33 (D92 in NedA) is missing. **e**, The  $F_o - F_c$  electron density maps (blue mesh) of the DANA inhibitor and a solvent tunnel connecting the bulk of the solvent and the catalytic site. **f**, same representation as in e but rotated 90 degrees along the x-axis.



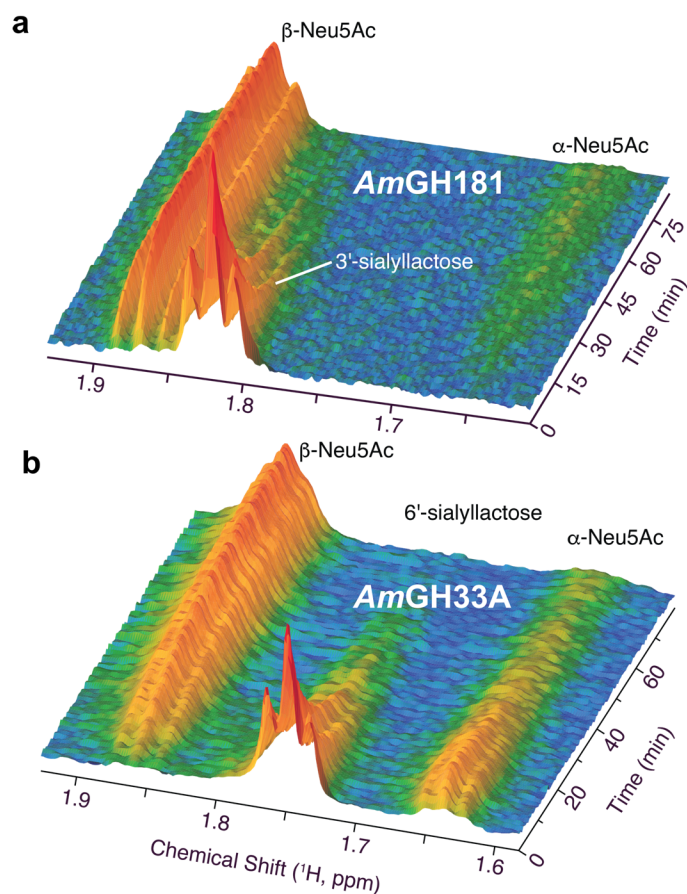

**Supplementary Fig. 15: The NMR analysis of the inverting mechanism of *AmGH181*.** **a**, Time series of  $^1\text{H}$  NMR real time spectra of the *AmGH181*-catalysed conversion of 3'-sialyllactose at 310 K and pH 6.8. The spectral region containing the axial  $^1\text{H}$ -3 signal in sialic acid (Neu5Ac) is depicted. The spectral series showed that  $\beta$ -Neu5Ac is the initial product of the reaction. Some  $\alpha$ -Neu5Ac emerges as the reaction progresses due to mutarotation. These data provide evidence that the hydrolysis of Neu5Ac proceeds with the inversion of anomeric configuration in the previously undescribed GH181 family. **b**, Control experiment that shows a time series of  $^1\text{H}$  NMR real time spectra of the *AmGH33B* catalysed conversion of 6'-sialyllactose at 310 K and pH 6.8. The spectral region containing the axial  $^1\text{H}$ -3 signal in sialic acid (Neu5Ac) is depicted. The spectral series showed that  $\alpha$ -Neu5Ac is the initial product of the reaction that mutarotates to  $\beta$ -Neu5Ac with a half time of about 80 min to reach about 90% of the total Neu5Ac in the solution. These data are consistent with the known retaining mechanism within GH33. The data are from a single ( $n=1$ ) experiment. Source data are provided as a Source Data file labelled with the corresponding figure number and panel definition.

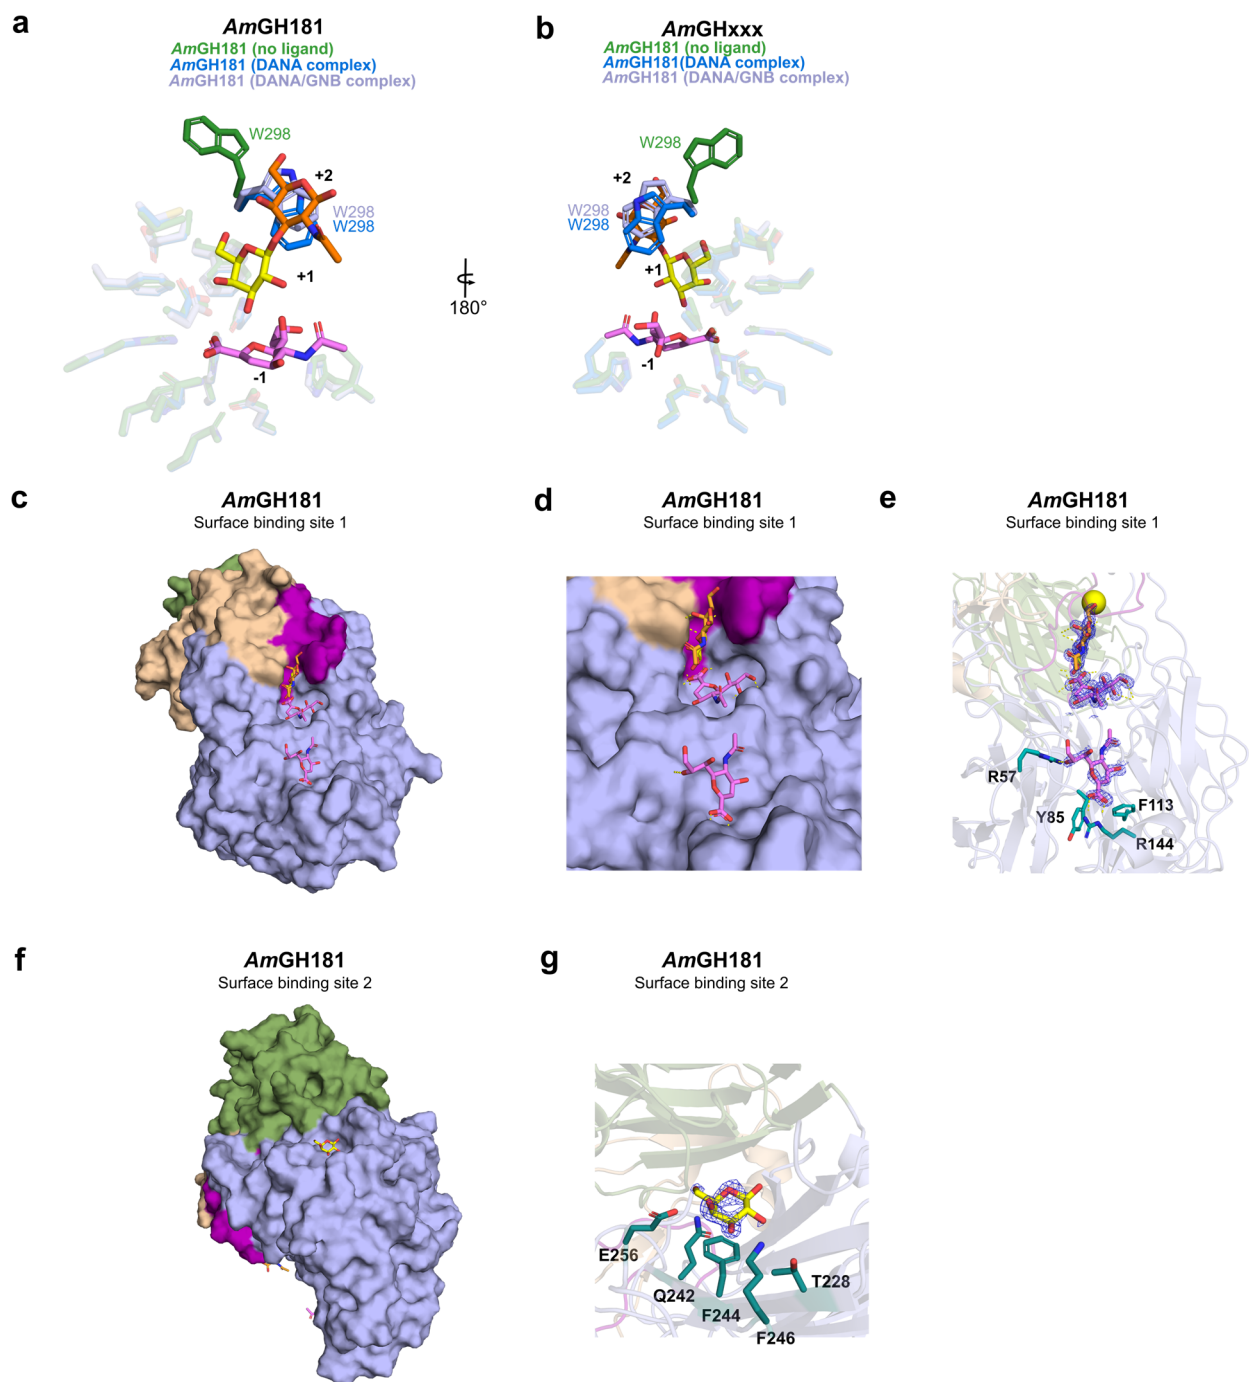

**Supplementary Fig. 16: Ligand binding at the active site and secondary surface binding sites of AmGH181.** **a**, Comparison of the ligand free (green sticks), DANA bound (blue) or DANA+GNB bound (light purple) structure, showing an induced fit flipping movement of a tryptophan sidechain to provide aromatic stacking for the GalNAc at subsite +2 in the two ligand-bound structures. **b**, The same as **a**, but turned 180°. **c**, Surface binding site 1 adjacent to the active site with a DANA molecule bound. **d**, Zoom in view as in **c**. **e**, potential binding residues at 4 Å distance from the modelled DANA molecule. **f**, The surface binding site 2 at the opposite side of the active site with a modelled galactose unit bound at a shallow groove. **g**, The potential binding residues of the modelled Gal with a phenylalanine aromatic stacking interaction flanked by polar residues. (e and g) Unbiased  $F_o - F_c$  electron density maps are represented as blue mesh.

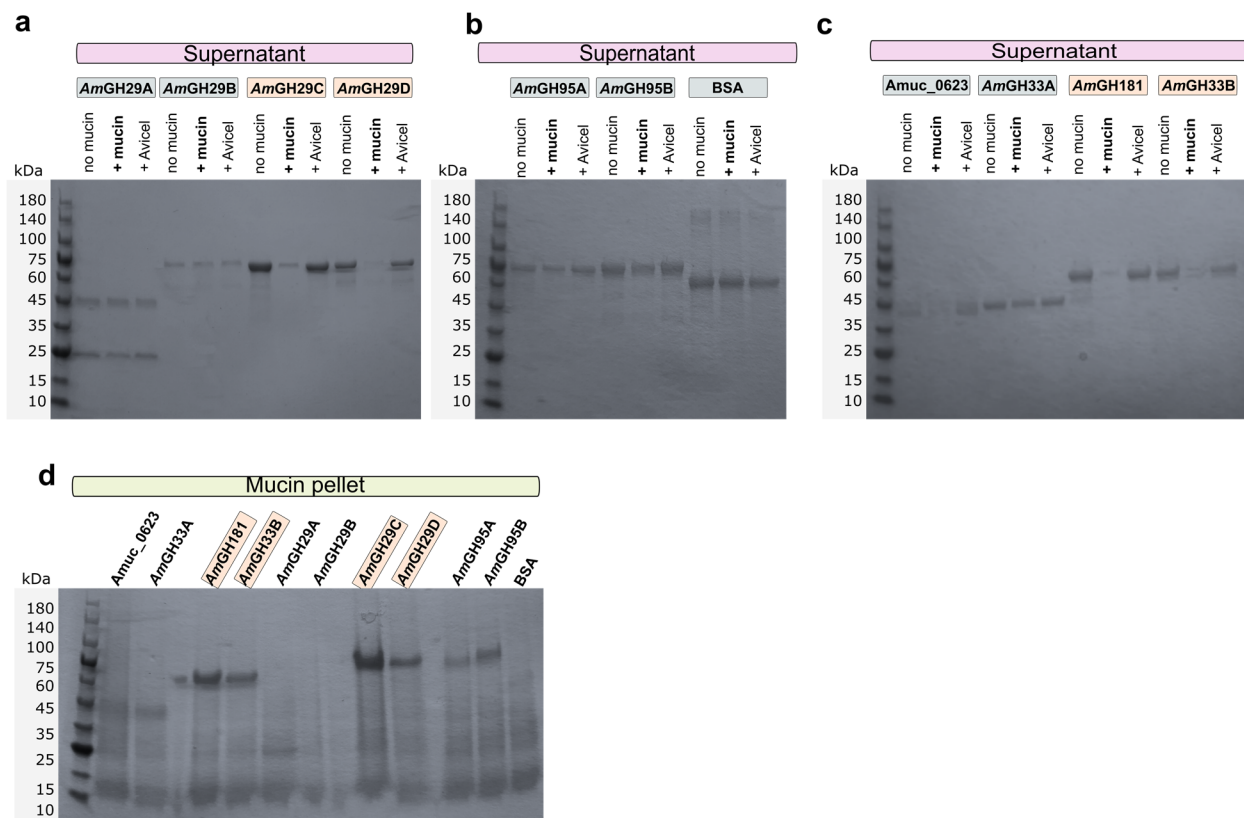

**Supplementary Fig. 17: Binding of *A. muciniphila* fucosidases and sialidases to mucin.** a-d, Representative SDS-PAGE gels showing pulldown binding assays of *A. muciniphila* fucosidases, sialidases and of a negative control protein (BSA) binding to insoluble PGM and Avicel (about 60% crystalline cellulose) is used as a negative control. A marked decrease in residual enzyme in the supernatant of the binding assay (decreased band intensity) is indicative of the strong association of the enzyme to the insoluble mucin pellet, which is also evidenced by high recovery of the enzyme from the pellets of the binding assays. The data are from two independent experiments (n=2) whereby all analyses yielded similar results. The grey boxes denote enzymes that showed weak or no binding, whereas the bisque coloured boxes denote enzymes that had strong binding to mucin, based on their depletion from the supernatants (pink boxes) of the binding assays. The binding is also investigated by evaluating the proteins in the pellets of the binding assay (green box) that contained the insoluble mucin and the proteins associated to it. The same bisque colour is also used in the pellet fraction to denote strong association, based on the recovery of the bound enzymes from the pellet fraction. The GH95 proteins appear to display some binding, but it is clearly much weaker than counterparts that are highlighted as tight binders in this analysis. Source data are provided as a Source Data file labelled with the corresponding figure number and panel definition.

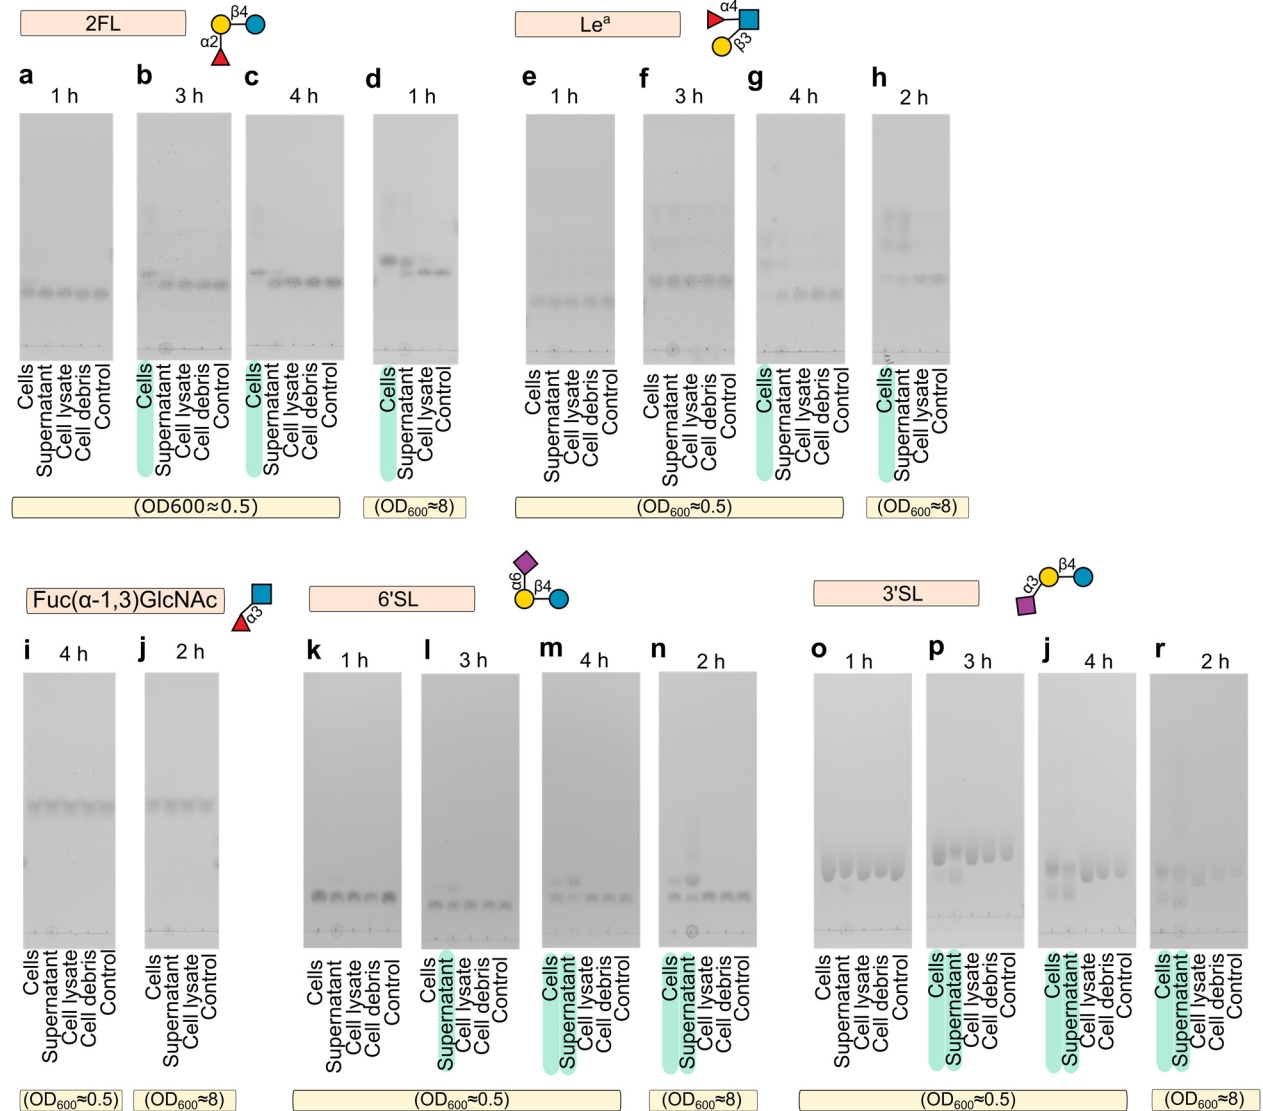

**Supplementary Fig. 18: Localization of fucosidase and sialidase activities encoded by *A. muciniphila*.** **a-d**,  $\alpha$ 1,2-Fucosidase activity of *A. muciniphila* as assayed on 2FL with intact cells, culture supernatants, soluble cell lysates, insoluble cell debris fraction and a buffer control using TLC analysis. **e-h**,  $\alpha$ 1,4-Fucosidase activity of *A. muciniphila* as assayed on Le<sup>a</sup> trisaccharide on similar cell culture fractions as above with a buffer as a negative control. **i-j**,  $\alpha$ 1,3-Fucosidase activity of *A. muciniphila* as assayed on Fuc  $\alpha$ 1,3 GlcNAc using same culture fractions and control as above. **k-n**,  $\alpha$ 2,6-Sialidase activity of *A. muciniphila* as assayed on 6'SL with intact cells, culture supernatants, cell lysates, cell debris and a buffer control. **o-r**,  $\alpha$ 2,3-Sialidase activity of *A. muciniphila* as assayed on 3'SL with intact cells, culture supernatants, cell lysates, cell debris and a buffer control. The experiments have been performed on cells grown porcine gastric mucin and pure oligosaccharide substrates. Fractions showing highest activity are highlighted with green boxes. The data are from at least three independent experiments (n=3) whereby all analyses yielded similar results. The pellets were resuspended in the same volume as that of the reactions with the supernatants to allow direct comparison. Source data are provided as a Source Data file labelled with the corresponding figure number and panel definition.



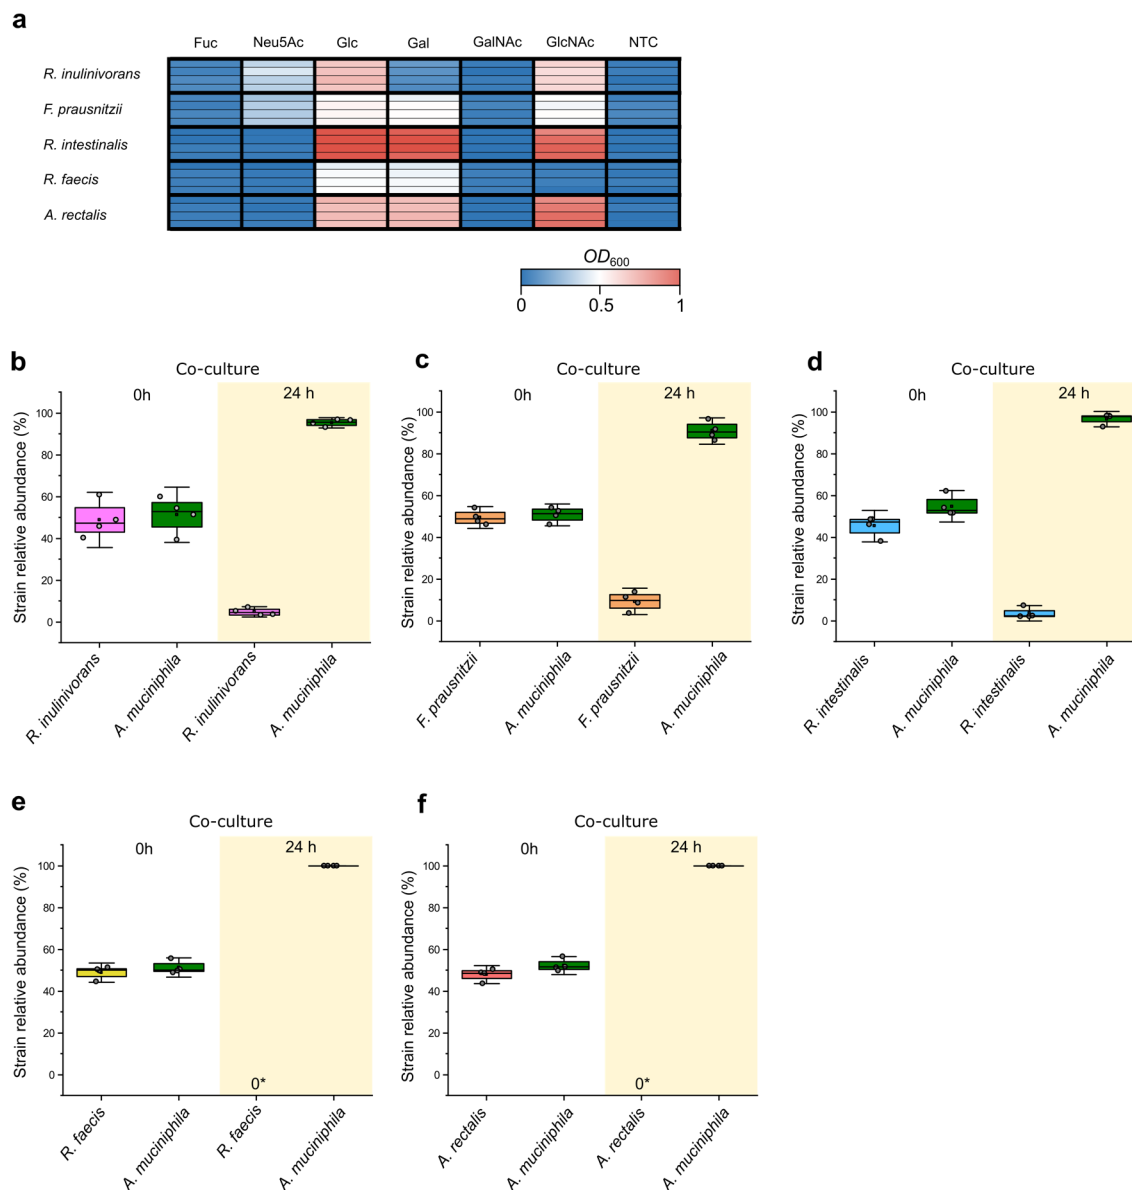

**Supplementary Figure 19: Growth of butyrate producing Clostridia on monosaccharides from mucin and in competition with *A. muciniphila* on PCM. a**, Growth of *Roseburia inulinivorans*, *Faecalibacterium prausnitzii*, *Roseburia intestinalis*, *Roseburia faecis* and *Agathobacter rectalis*, on YCFA supplemented with 0.5 % (w/v) monosaccharides from mucin after 24h. Growth experiments were performed in four independent biological replicates (n=4). **b-f**, The relative abundance of *R. inulinivorans*, *F. prausnitzii*, *R. intestinalis*, *R. faecis*, and *A. rectalis*, respectively, at the start of co-culture growth with *A. muciniphila* on PCM (0 h) and at 24 h. Relative strain abundances were determined with qPCR (one analysis per biological replicate, n=1) from the four independent biological replicate co-cultures presented in Fig. 4 (n=4). In the boxplot, the box represents the interquartile range (25<sup>th</sup>-75<sup>th</sup> percentile) and the whisker is 1.5 times the standard deviation (SD). The median is represented as solid line and the mean as a solid black square, with individual measurements are grey circles. Source data are provided as a Source Data file labelled with the corresponding figure number and panel definition.

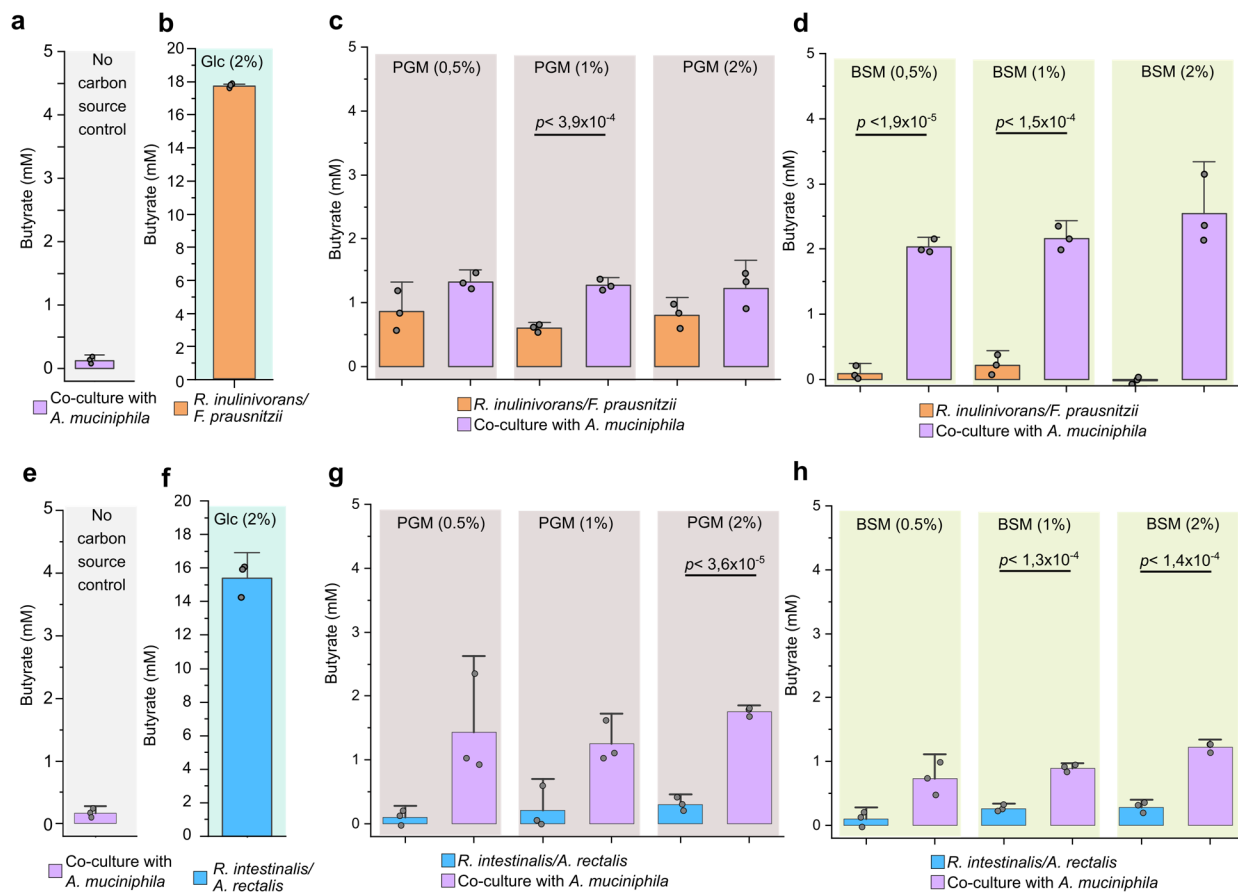

**Supplementary Figure 20: Cross-feeding of butyrate producing Clostridia in *A. muciniphila* co-cultures on mucins with different degree of sialylation.** **a**, Butyrate concentration of co-cultures of *R. inulinivorans*, *F. prausnitzii* and *A. muciniphila* grown on a no-carbon source control after 24h. **b**, same as **a**, but with glucose (2%) as a carbon source. **c**, Butyrate concentration of *R. inulinivorans* and *F. prausnitzii* only (orange) or in co-culture with *A. muciniphila* (purple) on a different concentrations of PGM after 24 h. **d**, Butyrate concentration of *R. inulinivorans* and *F. prausnitzii* only (orange) or in co-culture with *A. muciniphila* (purple) on a different concentration of BSM after 24 h. **e**, Butyrate concentration of co-cultures of *R. intestinalis*, *A. rectalis* and *A. muciniphila* on a non carbon source control after 24h. **f**, Butyrate concentration of *R. intestinalis* and *A. rectalis* only on glucose (2%) after 24 h. **g**, Butyrate concentration of *R. intestinalis* and *A. rectalis* only (blue) or in co-culture with *A. muciniphila* (purple) on a different concentrations of PGM after 24 h. **h**, Butyrate concentration of *R. intestinalis* and *A. rectalis* only (blue) or in co-culture with *A. muciniphila* (purple) on a different concentration of BSM after 24 h. **a-h**, Growth cultures and butyrate quantifications were performed in independent biological triplicates (n=3) and data are presented as mean values with the error bars representing the standard deviation (SD). The statistical significance between butyrate concentrations reached was evaluated using an unpaired two-tailed Student's *t*-test and the corresponding *p*-values are included in the individual figure panels. Source data are provided as a Source Data file labelled with the corresponding figure number and panel definition.

**Supplementary Table 1: Enzyme names and primers**

| Cloning primers                              |                 |         |                            |                                                     |                                                       |
|----------------------------------------------|-----------------|---------|----------------------------|-----------------------------------------------------|-------------------------------------------------------|
| Locus tag                                    | SP <sup>a</sup> | Enzyme  | GenBank                    | Sense primer                                        | Antisense primer                                      |
| Amuc_0010                                    | 20              | AmGH29A | <a href="#">ACD03857.1</a> | <b>AGGAGATATACCATG</b> CAGTCCGC<br>CACTAAAATCATTACG | <b>GGTGGTGGTGCTCGA</b> GTTTGCT<br>CAGTTTGATGACGGAAC   |
| Amuc_0146                                    | 23              | AmGH29B | <a href="#">ACD03990.1</a> | <b>AGGAGATATACCATG</b> GGGAATGC<br>CATCACCCTCC      | <b>GGTGGTGGTGCTCGA</b> GTTGAAG<br>TTTGATGACGGTATCCAGC |
| Amuc_0392                                    | 36              | AmGH29C | <a href="#">ACD04231.1</a> | <b>AGGAGATATACCATG</b> GGCTGGAC<br>CGCAGCACC        | <b>GGTGGTGGTGCTCGA</b> GTTTGCC<br>TGCGGGAGTGC         |
| Amuc_0846                                    | 24              | AmGH29D | <a href="#">ACD04679.1</a> | <b>AGGAGATATACCATG</b> GGGCCGA<br>AGGGCTGTTTAAAC    | <b>GGTGGTGGTGCTCGA</b> GTTTTCC<br>CAATACGCCAGCTC      |
| Amuc_0186                                    | 23              | AmGH95A | <a href="#">ACD04030.1</a> | <b>AGGAGATATACCATG</b> GCCATTCC<br>GGCCCCCATG       | <b>GGTGGTGGTGCTCGA</b> GATGGG<br>AAAGCGGAGGAAAATCAAG  |
| Amuc_1120                                    | 13              | AmGH95B | <a href="#">ACD04946.1</a> | <b>AGGAGATATACCATG</b> AGTGCCGT<br>TTCTTTCGGGTGG    | <b>GGTGGTGGTGCTCGA</b> GCCTGGC<br>CGCGGGCTG           |
| Amuc_0623                                    | 21              |         | <a href="#">ACD04460.1</a> | <b>AGGAGATATACCATG</b> ACCGTACC<br>GGCCATTCC        | <b>GGTGGTGGTGCTCGA</b> GGGGAC<br>GTTTCAGAAAGCGATTAAAC |
| Amuc_0625                                    | 38              | AmGH33A | <a href="#">ACD04462.1</a> | <b>AGGAGATATACCATG</b> CAGGAAGA<br>GAAAACCGGTTTCC   | <b>GGTGGTGGTGCTCGA</b> GCTTGAG<br>AACAGGAGCTTTTTTGC   |
| Amuc_1835                                    | 17              | AmGH33B | <a href="#">ACD05653.1</a> | <b>AGGAGATATACCATG</b> GGCAAGG<br>AAAGCTTTGAGCAGG   | <b>GGTGGTGGTGCTCGA</b> GGCGCG<br>CATTTTTTGCCTTAAG     |
| Amuc_1547                                    | 22              | AmGH181 | <a href="#">ACD05368.1</a> | <b>AGGAGATATACCATG</b> GCACCCGT<br>TCCGGAAC         | <b>GGTGGTGGTGCTCGA</b> GCTTCAC<br>CCGGGCATTAC         |
| qPCR primers                                 |                 |         |                            |                                                     |                                                       |
| Target bacteria                              |                 |         |                            |                                                     |                                                       |
|                                              |                 |         | Sense primer               |                                                     | Antisense primer                                      |
| <i>Akkermansia</i> spp.                      |                 |         | GCTCACCAAGGCGATGACGG       |                                                     | TGCTCCACATGACAGGGGTTT<br>AC                           |
| <i>Faecalibacterium</i> spp.                 |                 |         | GATGGCCTCGCG TCCGATTAG     |                                                     | CCGAAGACCTTC TTCCTCC                                  |
| <i>Roseburia</i> spp. and <i>A. rectalis</i> |                 |         | GCGGTRCGGCAAGTCTGA         |                                                     | CCTCCGACACTCTAGTMCGAC                                 |

<sup>a</sup>The size of the signal peptide in amino acids as predicted from SignalP (V.5.0) (see Materials and methods section). The cloning vector homologous recombination patches to the cloning cassette of the used pET28a(+) vector are in bold. The *A. muciniphila* sialidases with the locus tags Amuc\_0623, Amuc\_0625, Amuc\_1547 and Amuc\_1835 have been referred to as Am0705, Am0707, Am1757 and Am2085 respectively<sup>1</sup>, in previous work that used fluorescently labelled model substrates to indirectly show sialidase activity.

1. Huang K, *et al.* Biochemical characterization of the neuraminidase pool of the human gut symbiont *Akkermansia muciniphila*. *Carbohydr Res* **415**, 60-65 (2015).

**Supplementary Table 2: Kinetics parameters of *A. muciniphila* fucosidases.**

| Enzyme                                                                |                |                 |                                   |                    |                |                |
|-----------------------------------------------------------------------|----------------|-----------------|-----------------------------------|--------------------|----------------|----------------|
|                                                                       | <i>AmGH29A</i> | <i>AmGH29B</i>  | <i>AmGH29C</i>                    | <i>AmGH29D</i>     | <i>AmGH95A</i> | <i>AmGH95B</i> |
| $k_{\text{cat}}$<br>(s <sup>-1</sup> )                                | 43 ± 1.5       | 0.10 ± 0.0062   | (9.9 ± 0.39)<br>x10 <sup>-3</sup> | 0.022 ±<br>0.0010  | 0.98 ± 0.017   | 0.37 ± 0.017   |
| $K_{\text{M}}$<br>(mM)                                                | 1.1 ± 0.11     | 1.6 ± 0.33      | 4.1 ± 0.41                        | 2.25 ± 0.34        | 0.76 ± 0.044   | 3.0 ± 0.46     |
| $k_{\text{cat}}/K_{\text{M}}$<br>(s <sup>-1</sup> ·mM <sup>-1</sup> ) | 41 ± 4.6       | 0.0063 ± 0.0013 | 0.15 ± 0.0056                     | 0.0096 ±<br>0.0015 | 1.29 ± 0.077   | 0.12 ± 0.020   |

The kinetic parameters were determined towards the model substrate *para*-nitrophenyl- $\alpha$ -L-Fucoside (*p*NPFuc) at 37 °C for 180 min in 20 mM HEPES, 150 mM NaCl, pH 6.8. Data are mean values of three independent experiments (n=3) with standard deviation (SD). Source data are provided as a Source Data file labelled with the corresponding table number.

**Supplementary Table 3: Number of assigned *O*- and *N*-glycan structures studied in this work.**

| Substrate                                    | Number of assigned glycan structures in the fucosidase analysis |             |            |
|----------------------------------------------|-----------------------------------------------------------------|-------------|------------|
|                                              | Total                                                           | Fucosylated | Sialylated |
| <i>O</i> -glycans from PGM, PCM and fetuin   | 160                                                             | 88          | 44         |
| <i>N</i> -glycans from human IgG             | 22                                                              | 15          | 10         |
| Substrate                                    | Number of assigned glycan structures in the sialidase analysis  |             |            |
|                                              | Total                                                           | Fucosylated | Sialylated |
| <i>O</i> -glycans from PCM                   | 80                                                              | 41          | 30         |
| <i>O</i> -glycans from MUC2 <sub>Mouse</sub> | 74                                                              | 17          | 36         |
| <i>N</i> -glycans from human IgG             | 24*                                                             | 13*         | 10*        |

Number of glycan structures that are assigned from the LC-MS analysis of reactions of *A. muciniphila* fucosidases and sialidases on different substrates. \*The *N*-glycans are from a different experiment than those analysed for fucosidase activity.

**Supplementary Table 4: Fucosidase relative activity towards porcine gastric, colonic mucin and fetuin.**

| Enzyme  | O-glycans              |                          |                                           |                            |
|---------|------------------------|--------------------------|-------------------------------------------|----------------------------|
|         | non-fucosylated<br>(%) | Fuc- $\alpha$ 1,2<br>(%) | Fuc- $\alpha$ 1,2 & $\alpha$ 1,3/4<br>(%) | Fuc- $\alpha$ 1,3/4<br>(%) |
| Control | 56.6                   | 21.2                     | 10.9                                      | 11.3                       |
| AmGH29A | 51.6*                  | 23.4*                    | 12.8*                                     | 12.2*                      |
| AmGH29B | 57.4*                  | 21.3                     | 10.6                                      | 10.7                       |
| AmGH29C | 69.2                   | 30.2                     | 0.3                                       | 0.3                        |
| AmGH29D | 59.9                   | 29.3                     | 4.8                                       | 6.0                        |
| AmGH95A | 58.7                   | 17.9                     | 10.9                                      | 12.6                       |
| AmGH95B | 74.3                   | 2.5                      | 0                                         | 23.2                       |

Abundance (%) of non-fucosylated and fucosylated O-glycans present in a 1:1:1 per weight mixture of porcine gastric mucin, porcine colonic mucin and fetuin before and after incubation with *A. muciniphila* fucosidases or with buffer as control. Abundances are calculated based on relative intensities of 166 assigned individual glycan structures detected by LC-ESI/MS. Data are from a single (n=1) experiment with enzymatic overnight incubations. The relative abundances were calculated by integration of the LC-ESI/MS ion chromatogram peak (area under the curve, AUC) and the data in the column are the summed relative abundances for each O-glycan category. \*The changes observed for these enzymatic incubations as compared to the control, reflect the noise of the experiment due to minor differences in the amounts of mucin blots used to assay activity.

**Supplementary Table 5: Normalized activity of *A. muciniphila* fucosidases on HMOs, mucins and fetuin.**

| Substrate | Normalised activity (s <sup>-1</sup> ) |                               |                              |                |                |                |
|-----------|----------------------------------------|-------------------------------|------------------------------|----------------|----------------|----------------|
|           | <i>AmGH29A</i>                         | <i>AmGH29B</i>                | <i>AmGH29C</i>               | <i>AmGH29D</i> | <i>AmGH95A</i> | <i>AmGH95B</i> |
| HMOs      | 0.63 ± 0.092                           | 0.084 ± 0.011                 | 4.5 ± 0.43                   | 4.0 ± 0.026    | 3.9 ± 0.078    | 4.0 ± 0.13     |
| Fetuin    | N.D.                                   | N.D.                          | N.D.                         | N.D.           | N.D.           | N.D.           |
| PGM       | 0.028 ± 0.002                          | 0.019 ± 0.0015                | (59 ± 0.41)×10 <sup>-3</sup> | 0.045 ± 0.0014 | 0.36 ± 0.0041  | 4.4 ± 0.085    |
| PCM       | (5.8 ± 0.074)×10 <sup>-3</sup>         | (6.6 ± 0.23)×10 <sup>-3</sup> | 1.1 ± 0.029                  | 0.46 ± 0.018   | 0.095 ± 0.014  | 0.79 ± 0.047   |

Normalized activity (V/E) determined towards 0.5 % (w/v) substrate concentration and a with an enzyme concentration of 0.5 μM. Enzymatic reactions were performed for 1 h, except for reactions containing fetuin which were incubated for 3 h. N.D. not detected. The very low activity of *AmGH29A* and *AmGH29B* on HMOs is likely attributed to activity on the trisaccharide 2'-fucosyl lactose (2FL, see Supplementary Fig. 4e). Data are mean values of three independent experiments (n=3) with standard deviation (SD). Source data are provided as a Source Data file labelled with the corresponding table number.

**Supplementary Table 6: Activity profiles of *A. muciniphila* sialidases on porcine colonic mucin *O*-glycans.**

| Enzyme    | <i>O</i> -glycans |              |                             |              |
|-----------|-------------------|--------------|-----------------------------|--------------|
|           | non-sialylated    | $\alpha 2,3$ | $\alpha 2,3$ & $\alpha 2,6$ | $\alpha 2,6$ |
|           | (%)               | (%)          | (%)                         | (%)          |
| Control   | 72.2              | 7.0          | 1.8                         | 19           |
| Amuc_0623 | 75.3*             | 6.0*         | 2.1*                        | 16.6*        |
| AmGH33A   | 96.9              | 3.1          | 0                           | 0            |
| AmGH33B   | 99.3              | 0.7          | 0                           | 0            |
| AmGH181   | 75.6              | 2.6          | 0.4                         | 21.4         |

Relative abundance (%) of non-sialylated and differentially sialylated *O*-glycans from porcine colonic mucin before and after incubation with *A. muciniphila* sialidases and or with buffer as control. The relative abundances were calculated based on relative intensities of 82 assigned individual glycan structures detected by LC-MS. The data are for both Neu5Ac and Neu5Gc forms of sialic acid that are cleaved by the enzymes. Data are from a single (n=1) experiment and an overnight incubation. \*The differences observed for these enzymatic incubations as compared to the control, reflect the noise due to minor differences in the amounts of mucin blots used to assay activity.



**Supplementary Table 7: Normalised activities of *A. muciniphila* sialidases on HMOs and attached *O*-glycans from mucin and fetuin.**

| Substrate | Sialidase normalised activity (s <sup>-1</sup> ) |                |                             |                             |
|-----------|--------------------------------------------------|----------------|-----------------------------|-----------------------------|
|           | <i>Amuc_0623</i>                                 | <i>AmGH33A</i> | <i>AmGH181</i>              | <i>AmGH33B</i>              |
| HMOs      | (3.4 ± 0.46)x10 <sup>-3</sup>                    | 0.17 ± 0.015   | (13 ± 3.1)x10 <sup>-3</sup> | 0.18 ± 0.022                |
| Fetuin    | (35 ± 6.1)x10 <sup>-3</sup>                      | 0.15 ± 0.02    | (75 ± 36)x10 <sup>-3</sup>  | 0.21 ± 0.050                |
| PGM       | N.D.                                             | 0.014 ± 0.0045 | N.D.                        | (36 ± 4.1)x10 <sup>-3</sup> |
| PCM       | (5.88 ± 2.1)x10 <sup>-3</sup>                    | 0.019 ± 0.0019 | (13 ± 3.0)x10 <sup>-3</sup> | (37 ± 6.1)x10 <sup>-3</sup> |

Normalized activity (V/E) were determined towards 0.5 % (w/v) substrate concentration and with an enzyme concentration of 0.5 µM as measured by the release of sialic acid using HPAEC-PAD. N.D. not detected within 1 h or 3 h assays. Activity of *AmGH181* on HMOs likely attributed to the very low activity on 3'-Sialyl lactose. Data are means of triplicates (n=3) with standard deviation (SD). Source data are provided as a Source Data file labelled with the corresponding table number.

**Supplementary Table 8: The top structural orthologues of AmGH29D.**

|                                                                                                                                                                                                                                                                 | PDB ID | Z-score | RMSD<br>(Å) | Aligned <sup>a</sup> | Total <sup>b</sup> | Identity<br>(%) | name/GH/Source organism                                               |
|-----------------------------------------------------------------------------------------------------------------------------------------------------------------------------------------------------------------------------------------------------------------|--------|---------|-------------|----------------------|--------------------|-----------------|-----------------------------------------------------------------------|
| 1                                                                                                                                                                                                                                                               | 6OR4-B | 50.9    | 1.5         | 438                  | 449                | 39              | SpGH29/GH29/ <i>Streptococcus pneumoniae</i> TIGR4                    |
| 2                                                                                                                                                                                                                                                               | 5K9H-A | 50.3    | 7.5         | 457                  | 554                | 39              | GH29_0940/GH29/Rumen unknown bacteria                                 |
| 3                                                                                                                                                                                                                                                               | 3UES-A | 48.8    | 1.5         | 433                  | 457                | 41              | BiAfcB/GH29/ <i>Bifidobacterium longum</i> subsp. infantis ATCC 15697 |
| 4                                                                                                                                                                                                                                                               | 4OZO-B | 48.1    | 1.8         | 439                  | 459                | 40              | BT2192/GH29/ <i>Bacteroides thetaiotaomicron</i> VPI-5482             |
| 5                                                                                                                                                                                                                                                               | 4zrx-A | 45.5    | 3.0         | 451                  | 581                | 42              | Bovatus_01698/GH29/ <i>Bacteroides ovatus</i> ATCC 8483               |
| 6                                                                                                                                                                                                                                                               | 6tr3-A | 42.6    | 2.2         | 448                  | 505                | 34              | CDL26_02305/GH29/ <i>Ruminococcus gnavus</i> GH29 fucosidase E1       |
| 7                                                                                                                                                                                                                                                               | 3gza-b | 41.5    | 1.9         | 396                  | 431                | 30              | BT3798/GH29/ <i>Bacteroides thetaiotaomicron</i> VPI-5482             |
| 8                                                                                                                                                                                                                                                               | 6gn6-C | 33.5    | 2.8         | 301                  | 421                | 22              | aLfuk1/GH29/ <i>Paenibacillus thiaminolyticus</i>                     |
| 9                                                                                                                                                                                                                                                               | 6o1j-A | 32.6    | 2.0         | 272                  | 329                | 25              | BN194_28780/GH29/ <i>Lactocaseibacillus casei</i> W56                 |
| 10                                                                                                                                                                                                                                                              | 4jfs-B | 31.4    | 2.7         | 307                  | 437                | 26              | BtFuc2970/GH29/                                                       |
| The data are based on a DALI search and only the top hit of mutants and/or complexes with ligands is included to avoid redundancy. <sup>a</sup> Aligned residues between the hit protein and AmGH29D. <sup>b</sup> Total number of residues in the hit protein. |        |         |             |                      |                    |                 |                                                                       |

**Supplementary Table 9: The top structural orthologues of AmGH181.**

|                                                                                                                                                                                                                                                 | PDB ID | Z-score | RMSD (Å) | Aligned <sup>a</sup> | Total <sup>b</sup> | Identity (%) | name/GH/Source organism                                                     |
|-------------------------------------------------------------------------------------------------------------------------------------------------------------------------------------------------------------------------------------------------|--------|---------|----------|----------------------|--------------------|--------------|-----------------------------------------------------------------------------|
| 1                                                                                                                                                                                                                                               | 1W8O-A | 26.2    | 3.6      | 311                  | 601                | 16           | NedA sialidase/GH33<br><i>Micromonospora viridifaciens</i>                  |
| 2                                                                                                                                                                                                                                               | 1SNT-A | 26.1    | 2.8      | 281                  | 352                | 10           | Neu2 sialidase/GH33<br><i>Homo sapien</i>                                   |
| 3                                                                                                                                                                                                                                               | 2VK7-B | 25.6    | 2.9      | 283                  | 448                | 14           | NanI sialidase/GH33<br><i>Clostridium perfringens</i>                       |
| 4                                                                                                                                                                                                                                               | 3H73-B | 25.4    | 3.0      | 286                  | 477                | 16           | NanA sialidase/GH33<br><i>Streptococcus pneumoniae</i>                      |
| 5                                                                                                                                                                                                                                               | 5HX0-B | 24.4    | 3.0      | 279                  | 364                | 24           | Unknown protein/GH33<br><i>Dyadobacter fermentans</i>                       |
| 6                                                                                                                                                                                                                                               | 4XJZ-A | 23.9    | 3.1      | 280                  | 658                | 20           | NanB sialidase/GH33/<br><i>Streptococcus pneumoniae</i>                     |
| 7                                                                                                                                                                                                                                               | 2SLI-A | 23.8    | 3.0      | 267                  | 679                | 18           | Intramolecular transsialidase L<br>(MDSA)/GH33/ <i>Macrobacteria decora</i> |
| 8                                                                                                                                                                                                                                               | 4X47-A | 23.5    | 3.0      | 275                  | 489                | 20           | Anhydrosialidase<br>RgNanH/GH33/ <i>Ruminococcus gnavus</i>                 |
| 9                                                                                                                                                                                                                                               | 6MYV-A | 23.3    | 3.0      | 277                  | 522                | 20           | Sialidase/GH33/unidentified<br>bacterium                                    |
| 10                                                                                                                                                                                                                                              | 4YZ2-A | 23.2    | 2.9      | 272                  | 655                | 19           | NanC sialidase/GH33<br><i>Streptococcus pneumoniae</i>                      |
| Based on a DALI search; only the top hit of mutants and/or complexes with ligands is included to avoid redundancy. <sup>a</sup> Aligned residues between the hit protein and AmGH33B. <sup>b</sup> Total number of residues in the hit protein. |        |         |          |                      |                    |              |                                                                             |

**Supplementary Table 10: The top structural orthologues of the CBM-like domain of AmGH181.**

|    | PDB ID | Z-score | RMSD<br>(Å) | Aligned <sup>a</sup> | Total <sup>b</sup> | Identity<br>(%) | name/GH/Source organism                                          |
|----|--------|---------|-------------|----------------------|--------------------|-----------------|------------------------------------------------------------------|
| 1  | 5MQR-A | 15.4    | 2.1         | 127                  | 1082               | 15              | BT1020/GH33/ <i>Bacteroides thetaiotaomicron</i> ATCC 29148      |
| 2  | 4AGG-A | 12.9    | 2.8         | 121                  | 144                | 11              | Galectin/unknown <i>Cinachyrella</i> sp./marine sponge           |
| 3  | 4HLO-A | 12.6    | 2.2         | 114                  | 278                | 7               | Galectin/ <i>Tocascaris leonine</i> /helminth parasite           |
| 4  | 3AFK-A | 12.5    | 2.8         | 128                  | 168                | 11              | Galectin/ <i>Cyclocybe aegerita</i> /fungi                       |
| 5  | 5XRM-A | 12.3    | 2.6         | 117                  | 141                | 18              | Galectin/Homo sapiens                                            |
| 6  | 2A6Y-A | 11.5    | 3.1         | 140                  | 231                | 9               | Carbohydrate recognition domain/ <i>Saccharomyces cerevisiae</i> |
| 7  | 2WSU-B | 11      | 2.5         | 117                  | 306                | 10              | Galectin/ porine adenovirus 4                                    |
| 8  | 5N8K-A | 10.7    | 2.6         | 123                  | 644                | 11              | β-galactocerebrosidase/ <i>Mus musculus</i>                      |
| 9  | 1KIT-A | 10.7    | 2.6         | 119                  | 757                | 11              | GH33/ <i>Vibrio cholerae</i>                                     |
| 10 | 3WUC-B | 10.7    | 2.6         | 113                  | 137                | 14              | Galectin/ <i>Xenopus laevis</i>                                  |

The data are based on a DALI search and only the top hit of mutants and/or complexes with ligands is included to avoid redundancy. <sup>a</sup>Aligned residues between the hit protein and CBM-like domain of AmGH181. <sup>b</sup>Total number of residues in the hit protein.

**Supplementary Table 11: Inhibition of *A. muciniphila* fucosidases by 1-Deoxyfuconojirimycin (DFJ).**

|                      | Enzyme          |                 |                 |                 |                |                |
|----------------------|-----------------|-----------------|-----------------|-----------------|----------------|----------------|
|                      | <i>AmGH29A</i>  | <i>AmGH29B</i>  | <i>AmGH29C</i>  | <i>AmGH29D</i>  | <i>AmGH95A</i> | <i>AmGH95B</i> |
| $IC_{50}$ ( $\mu$ M) | 0.60 $\pm$ 0.02 | 1.50 $\pm$ 0.10 | 13.7 $\pm$ 0.41 | 7.29 $\pm$ 0.16 | 53.7 $\pm$ 5.9 | 24.0 $\pm$ 1.6 |

The inhibition constant  $IC_{50}$  was determined towards 2 mM *p*NPfuc substrate concentration with inhibitor concentrations in the 0.1 - 100  $\mu$ M range. The enzyme concentration=0.5  $\mu$ M for all fucosidases except for *AmGH29C* and *AmGH29D*, which were assayed at concentration= 10  $\mu$ M due to their low activity. Data are the means of three independent experiments (n=3) with standard deviation (SD). Source data are provided as a Source Data file labelled with the corresponding table number.

**Supplementary Table 12: Inhibition of *A. muciniphila* sialidases by 2,3-dehydro-2-deoxy-*N*-acetylneuraminic acid (DANA).**

|                                                                                                                                                                                                                                                                                                                                                                                                                                                                                                                                                                                                                                                                                                                                                                                                                                                                                                       | Enzyme                             |                                  |                                 |                                 |
|-------------------------------------------------------------------------------------------------------------------------------------------------------------------------------------------------------------------------------------------------------------------------------------------------------------------------------------------------------------------------------------------------------------------------------------------------------------------------------------------------------------------------------------------------------------------------------------------------------------------------------------------------------------------------------------------------------------------------------------------------------------------------------------------------------------------------------------------------------------------------------------------------------|------------------------------------|----------------------------------|---------------------------------|---------------------------------|
|                                                                                                                                                                                                                                                                                                                                                                                                                                                                                                                                                                                                                                                                                                                                                                                                                                                                                                       | Amuc_0623                          | AmGH33A                          | AmGH33B                         | AmGH181                         |
| $IC_{50}$ ( $\mu$ M)                                                                                                                                                                                                                                                                                                                                                                                                                                                                                                                                                                                                                                                                                                                                                                                                                                                                                  | N.D.                               | 61.4 $\pm$ 2.20                  | 133 $\pm$ 11.1                  | 199 $\pm$ 13.2                  |
| Normalized activity<br>(Emission units $s^{-1}$ nM $^{-1}$ )                                                                                                                                                                                                                                                                                                                                                                                                                                                                                                                                                                                                                                                                                                                                                                                                                                          | (3.7 $\pm$ 0.067) $\times 10^{-3}$ | (108 $\pm$ 6.8) $\times 10^{-3}$ | (74 $\pm$ 2.2) $\times 10^{-3}$ | (36 $\pm$ 1.7) $\times 10^{-3}$ |
| <p><math>IC_{50}</math> constants determined towards 1 mM 4-Methylumbelliferyl <i>N</i>-acetyl-<math>\alpha</math>-D-neuraminic (4MU-Neu5Ac) with an inhibitor concentration in the 0.01-1 mM range. The enzyme concentration was 50 nM for all sialidases, except Amuc_0623 which was assayed at 200 nM. Enzymatic reactions were performed for 30 min and the N.D. is not determined due to the low affinity towards DANA reflected by the lack of curvature, which precluded reliable determination of inhibition constant. The normalized activity, expression in arbitrary emission units per min and nM enzyme is also shown, to depict that the enzymes have different activity levels on this substrate. Data are means of three independent experiments (n=3) with standard deviation (SD). Source data are provided as a Source Data file labelled with the corresponding table number.</p> |                                    |                                  |                                 |                                 |

**Supplementary Table 13: The effects of fucosidase and sialidase inhibition on growth of *A. muciniphila* on PCM.**

|                 |                          | Growth substrate             |                  |               |                              |
|-----------------|--------------------------|------------------------------|------------------|---------------|------------------------------|
|                 |                          | PCM                          | PCM + Inhibitors | GlcNAc+GalNAc | GlcNAc+GalNAc+<br>Inhibitors |
| Time (h)        |                          |                              |                  |               |                              |
| 5 <sup>a</sup>  | <i>OD</i> <sub>600</sub> | 0.41 ± 0.01                  | 0.14 ± 0.01      | 0.21 ± 0.01   | 0.20 ± 0.01                  |
|                 | <i>p</i> -value          | P < 1.1 × 10 <sup>-8</sup>   |                  | P < 0.62      |                              |
| 8 <sup>a</sup>  | <i>OD</i> <sub>600</sub> | 1.11 ± 0.04                  | 0.19 ± 0.02      | 0.39 ± 0.02   | 0.40 ± 0.05                  |
|                 | <i>p</i> -value          | P < 8.59 × 10 <sup>-9</sup>  |                  | P < 0.58      |                              |
| 24 <sup>a</sup> | <i>OD</i> <sub>600</sub> | 1.39 ± 0.04                  | 0.46 ± 0.03      | 1.32 ± 0.02   | 1.32 ± 0.04                  |
|                 | <i>p</i> -value          | P < 1.42 × 10 <sup>-8</sup>  |                  | P < 0.93      |                              |
| 24 <sup>b</sup> | <i>OD</i> <sub>600</sub> | 1.41 ± 0.02                  | 0.03 ± 0.01      | 1.43 ± 0.06   | 1.45 ± 0.05                  |
|                 | <i>p</i> -value          | P < 4.45 × 10 <sup>-11</sup> |                  | P < 0.72      |                              |

Growth level of *A. muciniphila* in the absence or presence of an equimolar fucosidase:sialidase inhibitor blend on PCM or an equimolar mixture of GlcNAc:GalNAc after 5, 8 and 24h. Growth media were supplemented with 0.5% (w/v) carbohydrates and DFJ/DANA to a final concentration of 1 mM<sup>a</sup> or 20<sup>b</sup> mM of each inhibitor. The growth experiments were performed in 4 independent biological replicates (n=4) and the data are presented as mean values with standard deviations. Source data are provided as a Source Data file labelled with the corresponding table number. The statistical significance between *OD*<sub>600</sub> values reached was evaluated using an unpaired two-tailed Student's *t*-test and the corresponding *p*-values are indicated in the individual table cells.

**Supplementary Table 14: Prevalence of fucosidase and sialidase genes in *A. muciniphila* genomes**

| Fucosidase     | Enzyme           |                |                |                |                |                |
|----------------|------------------|----------------|----------------|----------------|----------------|----------------|
|                | <i>AmGH95A</i>   | <i>AmGH95B</i> | <i>AmGH29A</i> | <i>AmGH29B</i> | <i>AmGH29C</i> | <i>AmGH29D</i> |
| Prevalence (%) | 93.8             | 98.5           | 99.4           | 37.3           | 99.5           | 89.9           |
| Sialidase      | <i>Amuc_0623</i> | <i>AmGH33A</i> | <i>AmGH33B</i> | <i>AmGH181</i> |                |                |
|                | 24.4             | 98.3           | 98.9           | 98.3           |                |                |

Global prevalence of fucosidases and sialidases in 177 *A. muciniphila* genomes of human origin (see materials and methods). The prevalence of fucosidases and sialidases genes were analysed by a BLASTP search using the amino acid sequences of *AmGH95A*, *AmGH95B*, *AmGH29A*, *AmGH29B*, *AmGH29C*, *AmGH29D*, *Amuc\_0623*, *AmGH33A*, *AmGH33B* and *AmGH181* from *Akkermansia muciniphila* ATCC BAA-835 (same as *Akkermansia muciniphila* DSM 22959) as query.



|          |                          | Growth substrate                   |                  |                 |                            |
|----------|--------------------------|------------------------------------|------------------|-----------------|----------------------------|
| Time (h) |                          | PCM                                | PCM + Inhibitors | GlcNAc/GalNAc   | GlcNAc/GalNAc + Inhibitors |
| 5        | <i>OD</i> <sub>600</sub> | 0.41 ± 0.01                        | 0.14 ± 0.01      | 0.21 ± 0.01     | 0.20 ± 0.01                |
|          | <i>p</i> -value          | <i>p</i> < 1.1 x 10 <sup>-8</sup>  |                  | <i>p</i> < 0.62 |                            |
| 8        | <i>OD</i> <sub>600</sub> | 1.11 ± 0.04                        | 0.19 ± 0.02      | 0.39 ± 0.02     | 0.40 ± 0.05                |
|          | <i>p</i> -value          | <i>p</i> < 8.59 x 10 <sup>-9</sup> |                  | <i>p</i> < 0.58 |                            |
| 24       | <i>OD</i> <sub>600</sub> | 1.39 ± 0.04                        | 0.46 ± 0.03      | 1.32 ± 0.02     | 1.32 ± 0.04                |
|          | <i>p</i> -value          | <i>p</i> < 1.42 x 10 <sup>-8</sup> |                  | <i>p</i> < 0.93 |                            |
|          |                          |                                    |                  |                 |                            |

|          |                          | Growth substrate          |                  |               |                            |
|----------|--------------------------|---------------------------|------------------|---------------|----------------------------|
|          |                          | PCM                       | PCM + Inhibitors | GlcNAc/GalNAc | GlcNAc/GalNAc + Inhibitors |
| Time (h) |                          |                           |                  |               |                            |
| 5        | <i>OD</i> <sub>600</sub> | 0.41 ± 0.01               | 0.14 ± 0.01      | 0.21 ± 0.01   | 0.20 ± 0.01                |
|          | <i>p</i> -value          | $p < 1.1 \times 10^{-8}$  |                  | $p < 0.62$    |                            |
| 8        | <i>OD</i> <sub>600</sub> | 1.11 ± 0.04               | 0.19 ± 0.02      | 0.39 ± 0.02   | 0.40 ± 0.05                |
|          | <i>p</i> -value          | $p < 8.59 \times 10^{-9}$ |                  | $p < 0.58$    |                            |
| 24       | <i>OD</i> <sub>600</sub> | 1.39 ± 0.04               | 0.46 ± 0.03      | 1.32 ± 0.02   | 1.32 ± 0.04                |
|          | <i>p</i> -value          | $p < 1.42 \times 10^{-8}$ |                  | $p < 0.93$    |                            |

**Supplementary Table 15: Data collection and refinement statistics of AmGH29D**

| No additives                                                          |                                    |
|-----------------------------------------------------------------------|------------------------------------|
| PDB accession                                                         | 8AYR                               |
| Resolution range(Å)*                                                  | 34.45 - 2.70 (2.798 - 2.70)        |
| Space group                                                           | P 1                                |
| Unit cell (Å, °)                                                      | 76.19 76.45 84.5 88.41 89.08 88.23 |
| Total reflections                                                     | 184329 (14917)                     |
| Unique reflections                                                    | 47292 (3963)                       |
| Multiplicity                                                          | 3.9 (3.8)                          |
| Completeness (%)                                                      | 90.33 (75.09)                      |
| Mean I/sigma(I)                                                       | 9.93 (1.63)                        |
| Wilson B-factor                                                       | 59.87                              |
| R-merge                                                               | 0.082 (0.67)                       |
| R-meas                                                                | 0.094 (0.78)                       |
| R-pim                                                                 | 0.048 (0.40)                       |
| CC1/2                                                                 | 0.99 (0.86)                        |
| CC*                                                                   | 0.99 (0.96)                        |
| Reflections used in refinement                                        | 47185 (3953)                       |
| Reflections used for R-free                                           | 2450 (205)                         |
| R-work                                                                | 0.23 (0.42)                        |
| R-free                                                                | 0.27 (0.47)                        |
| CC(work)                                                              | 0.95 (0.84)                        |
| CC(free)                                                              | 0.92 (0.72)                        |
| Number of non-hydrogen atoms                                          | 10626                              |
| macromolecules                                                        | 10602                              |
| ligands                                                               | 4                                  |
| solvent                                                               | 20                                 |
| Protein residues                                                      | 1353                               |
| RMS(bonds, Å)                                                         | 0.005                              |
| RMS(angles, °)                                                        | 0.86                               |
| Ramachandran favoured (%)                                             | 91.48                              |
| Ramachandran allowed (%)                                              | 8.01                               |
| Ramachandran outliers (%)                                             | 0.52                               |
| Rotamer outliers (%)                                                  | 0.82                               |
| Clashscore                                                            | 10.98                              |
| Average B-factor (Å <sup>2</sup> )                                    | 90.90                              |
| macromolecules                                                        | 90.94                              |
| ligands                                                               | 96.59                              |
| solvent                                                               | 68.08                              |
| Number of TLS groups                                                  | 6                                  |
| *Statistics for the highest-resolution shell are shown in parentheses |                                    |

**Supplementary Table 16: Data collection and refinement statistics of AmGH181.**

|                                   | No ligand                      | DANA                            | DANA and GNB                    |
|-----------------------------------|--------------------------------|---------------------------------|---------------------------------|
| PDB accession                     | 8AXT                           | 8AXS                            | 8AXI                            |
| Resolution range(Å)*              | 53.74 - 1.59 (1.647 - 1.59)    | 46.35 - 1.3 (1.346 - 1.3)       | 47.23 - 1.25 (1.295 - 1.25)     |
| Space group                       | P 1 21 1                       | P 1 21 1                        | P 1 21 1                        |
| Unit cell(Å, °)                   | 72.96 56.79 146.72 90 94.55 90 | 104.07 51.78 118.44 90 93.07 90 | 103.92 51.51 118.47 90 93.15 90 |
| Total reflections                 | 1073418 (104775)               | 1692885 (126087)                | 2015188 (138573)                |
| Unique reflections                | 160820 (15926)                 | 308437 (29552)                  | 323490 (25068)                  |
| Multiplicity                      | 6.7 (6.6)                      | 5.5 (4.2)                       | 6.2 (5.5)                       |
| Completeness (%)                  | 99.77 (99.70)                  | 99.38 (95.93)                   | 93.50 (72.90)                   |
| Mean I/sigma(I)                   | 6.66 (1.35)                    | 11.78 (0.87)                    | 15.68 (2.50)                    |
| Wilson B-factor                   | 15.12                          | 16.59                           | 14.13                           |
| R-merge                           | 0.29 (>1)                      | 0.063 (>1)                      | 0.049 (0.63)                    |
| R-meas                            | 0.32 (>1)                      | 0.069 (>1)                      | 0.053 (0.70)                    |
| R-pim                             | 0.123(<1)                      | 0.027 (0.8868)                  | 0.021 (0.28)                    |
| CC1/2                             | 0.99 (0.33)                    | 0.999 (0.48)                    | 0.999 (0.87)                    |
| CC*                               | 0.997 (0.71)                   | 1 (0.81)                        | 1 (0.96)                        |
| Reflections used in refinement    | 160792 (15926)                 | 307572 (29515)                  | 323214 (25037)                  |
| Reflections used for R-free       | 8029 (805)                     | 15493 (1486)                    | 16213 (1226)                    |
| R-work                            | 0.168 (0.29)                   | 0.155 (0.42)                    | 0.153 (0.25)                    |
| R-free                            | 0.202 (0.33)                   | 0.175 (0.43)                    | 0.169 (0.27)                    |
| CC(work)                          | 0.963 (0.75)                   | 0.975 (0.68)                    | 0.970 (0.92)                    |
| CC(free)                          | 0.948 (0.62)                   | 0.969 (0.67)                    | 0.965 (0.90)                    |
| Number of non-hydrogen atoms      | 10349                          | 10778                           | 10756                           |
| macromolecules                    | 9014                           | 9212                            | 9057                            |
| ligands                           | 7                              | 180                             | 240                             |
| solvent                           | 1328                           | 1467                            | 1573                            |
| Protein residues                  | 1142                           | 1145                            | 1143                            |
| RMS(bonds, Å)                     | 0.010                          | 0.012                           | 0.011                           |
| RMS(angles, °)                    | 1.05                           | 1.06                            | 1.11                            |
| Ramachandran favoured (%)         | 96.40                          | 96.49                           | 96.75                           |
| Ramachandran allowed (%)          | 3.43                           | 3.34                            | 3.25                            |
| Ramachandran outliers (%)         | 0.18                           | 0.18                            | 0.00                            |
| Rotamer outliers (%)              | 0.31                           | 0.41                            | 0.31                            |
| Clashscore                        | 2.40                           | 2.54                            | 3.07                            |
| Average B-factor(Å <sup>2</sup> ) | 19.75                          | 24.20                           | 21.80                           |
| macromolecules                    | 18.48                          | 22.67                           | 19.99                           |
| ligands                           | 21.65                          | 31.64                           | 32.39                           |
| solvent                           | 28.36                          | 33.29                           | 31.36                           |
| Number of TLS groups              | 11                             | 12                              | 11                              |

\*Statistics for the highest-resolution shell are shown in parentheses.
